# Supplementary material for: Low-level repressive histone marks fine-tune gene transcription in neural stem cells
Source: eLife. 2023 Jun 14;12:e86127. doi: 10.7554/eLife.86127 (PMC10344426; doi:10.7554/eLife.86127)
Supplement: Supplementary file 1. [file elife-86127-supp1.xlsx]

## Sheet: Sheet1
NS	*	**	***	****
>0.05	0.05	0.005	0.0005	5e-05
P-Values		1.25004e-14				2.46549e-07	0.000407069				1.42814e-06	6.32297e-05	1.39977e-05				3.9669e-10	0.00144057	0.0107122	6.34396e-15				2.39172e-08	0.108144	0.96067	0.00327544				0.190171		2.19481e-20		0.000221391		3.61233e-07				0.938462		0.00193802				1.48026e-39
std	0.947005	0.937229			6.54578	5.60473	6.48012			38.4835	27.9692	88.8116	53.2244			10.801	22.8048	29.4763	31.4321	27.3238			12.6717	7.10829	14.0432	20.2674	30.4383			0.97205	0.913831	1.65204	3.55254	1.01109	1.42777	0.883087	1.07243			73.7987	73.084	73.5265	108.567			0.142399	0.380185
n	29	29			19	15	20			8	9	9	8			16	17	22	14	20			14	9	10	10	10			128	96	88	104	78	112	112	104			4	8	7	5			8390	218
average	10.0455	7.48224			5.47632	19.09	13.589			287.125	147.444	489	255.375			34.4375	97.9412	126.773	125.857	204.8			58.5714	94.4444	103.1	94.1	132.4			1	1.16667	2.32955	6.52885	1.12821	1.79464	1.0625	1.76923			356.75	353.125	735.857	457.8			0.202093	0.62203
2L	-	fruc		2P	-	fruc	ERD::fruc, zf		S4G	-	Erm (II) > 2x mamDN	-	Erm (II) > 2x mamDN		4A	+/+	fruAJ96u3/+	fruAJ96u3/ΔA	fruAJ96u3/ΔB	fruAJ96u3/ΔC		4E	+/+	fruAJ96u3/+	fruAJ96u3/ΔA	fruAJ96u3/ΔB	fruAJ96u3/ΔC		4O	CYCE-CNTRL	RNAi-CYCE-EXP	DPN-CNTRL	RNAi-DPN-EXP	KLU-CNTRL	RNAi-KLU-EXP	NOTCH-CNTRL	RNAi-NOTCH-EXP		4P	-	E(spl)mγRNAi	-	E(spl)mγRNAi		5G	Fru Peak	Pc		6G
	10.8	8.04			8.33	25.04	19.54			323	120	555	322			43	127	125	156	237			56	85	101	98	109			1	2	3	2	0	5	1	1			256	308	645	345			6.6348	0.743548
	10.4	9.51			0	8.06	16			227	143	427	352			25	83	96	106	247			44	108	122	74	87			0	0	3	0	0	0	1	2			350	338	706	402			1.65705	0.270058
	9.45	7.5			16.22	19.34	7.14			249	186	614	200			27	81	112	189	207			31	97	85	89	125			0	1	3	1	1	4	1	3			424	328	711	397			2.16837	0.258772
	9.34	8.7			1.79	11.08	9.52			265	147	617	226			27	93	120	157	224			67	91	98	95	97			0	1	3	12	3	4	0	1			397	505	687	547			1.09509	1.22307
	9.51	7.03			20	24.13	20.88			309	198	498	250			35	115	127	116	182			75	88	115	101	130			1	2	0	0	0	2	1	1				252	777	598			0.685926	0.195337
	9.55	8.745			19.15	18.33	5.13			276	139	426	218			39	91	147	154	214			54	102	87	95	119			0	0	3	4	2	0	0	2				385	754				1.5436	0.319146
	9.26	7.31			10.14	24.36	25			314	119	370	232			22	84	117	125	203			55	95	127	136	164			0	0	0	5	3	4	1	1				364	871				0.256672	1.44008
	9.04	6.985			2.13	10.56	15.09			334	124	423	243			29	75	108	120	169			74	91	96	112	175			0	2	4	8	0	1	1	2				345					0.188619	0.331588
	10.65	7.225			4.76	23.55	5.08				151	471				27	54	165	78	188			54	93	103	68	161			0	2	3	10	0	3	0	2									0.301316	0.444859
	10.45	5.785			0	22.17	27.59									37	103	110	134	167			53		97	73	157			0	1	2	5	0	3	1	1									0.18125	1.2752
	11.15	6.68			0	15.14	14.13									29	135	111	126	187			75							0	1	4	10	2	2	1	2									0.834375	0.676674
	9.7	8.29			0	18.24	6.25									30	98	142	72	220			56							2	2	4	10	1	1	2	2									0.208758	0.835017
	9.445	8.1			0	25.22	18.64									65	122	137	123	170			71							1	2	1	8	2	2	1	3									0.19697	0.836965
	9.77	6.93			6.9	22.04	7.69									31	99	151	106	185			55							0	1	3	13	0	4	1	3									0.227069	0.442381
	10.8	7.77			2.44	19.09	15.63									49	111	65		194										3	2	4	6	1	1	2	3									0.337719	0.422359
	11.5	7.72			0		10									36	67	101		192										0	2	4	16	0	1	1	3									0.303478	0.99976
	9.31	7.215			5.71		7.69										127	101		260										1	2	0	13	2	1	2	1									0.128655	0.523735
	10.35	7.48			2.38		15.38											137		247										1	1	1	4	2	0	1	2									0.121005	0.238222
	10.7	9.1			4.1		13.64											187		194										2	2	2	3	3	2	1	2									0.731061	0.265397
	10.8	5.25					11.76											96		209										2	3	3	5	1	0	1	1									0.181818	1.14703
	9.79	6.49																177												1	2	0	3	1	2	2	1									0.158458	0.626794
	8.755	6.645																157												0	1	4	8	2	0	1	0									0.323276	0.588771
	9.79	6.76																												1	1	3	8	2	0	2	0									0.192708	0.390462
	11.25	7.715																												2	1	0	1	0	0	2	1									0.269841	0.324691
	11.2	8.35																												1	1	3	6	0	1	0	3									0.932718	1.13897
	7.4	7.01																												2	2	0	9	0	2	0	0									0.28903	0.497719
	9.275	8.17																												1	1	0	8	0	0	1	3									0.207196	0.28739
	10.235	7.09																												1	0	1	10	0	1	1	3									0.303483	0.215507
	11.65	7.39																												0	2	3	2	2	0	1	2									0.288159	0.686667
																														3	0	1	8	2	2	1	3									0.395508	0.587938
																														2	1	2	5	1	1	0	2									0.240209	0.746647
																														1	0	3	2	2	1	1	0									0.181271	0.271782
																														0	0	0	2	0	3	3	3									0.116628	0.197896
																														5	1	4	2	1	3	1	0									0.201465	0.254728
																														0	1	3	9	0	2	3	4									0.497442	0.237206
																														1	2	2	12	2	3	3	0									0.212589	0.604046
																														0	0	3	5	0	1	1	1									0.205663	0.429294
																														1	2	0	7	1	1	0	2									0.563786	0.378154
																														1	1	0	7	2	0	3	3									0.211813	1.40376
																														1	1	3	2	3	1	1	1									0.249135	1.01242
																														1	2	8	3	2	3	0	2									0.24	1.0403
																														0	0	1	4	2	3	0	1									0.373526	1.12218
																														2	0	3	9	1	0	2	1									0.30603	0.588278
																														2	2	5	11	2	3	1	1									0.240025	0.261737
																														0	3	4	10	0	2	4	1									0.196602	0.577175
																														1	0	2	8	2	0	2	1									0.191589	0.602723
																														1	1	0	7	1	0	2	1									0.23888	0.185652
																														0	1	1	7	1	4	0	1									0.374853	0.253342
																														0	0	2	9	1	1	2	2									0.141986	0.612259
																														2	2	4	16	0	1	0	2									0.189189	0.959206
																														2	1	3	8	0	0	0	3									0.175451	0.298077
																														0	2	0	5	0	1	1	1									0.202643	1.23589
																														1	0	2	9	1	2	2	1									0.181402	0.197319
																														1	1	2	1	1	1	2	2									0.184211	1.77476
																														1	0	3	6	1	4	2	1									0.27856	0.447852
																														2	2	1	11	1	2	0	2									0.0708502	1.67724
																														2	1	2	9	0	0	0	0									0.126682	0.365447
																														1	1	3	8	0	0	3	1									0.237685	1.50631
																														0	1	5	10	2	1	2	1									0.316074	0.643143
																														1	0	3	6	0	5	2	1									0.13961	0.205024
																														0	3	4	2	2	4	0	0									0.15566	0.896803
																														1	0	0	8	1	2	2	4									0.131198	0.559361
																														2	1	0	3	2	3	1	2									0.165312	0.595506
																														1	0	6	9	2	1	0	1									0.370213	1.25528
																														1	1	3	9	2	0	1	1									0.12561	0.25529
																														0	2	4	1	0	1	2	2									0.258716	0.26779
																														1	0	0	2	1	1	2	1									0.157986	0.304974
																														0	1	3	5	3	1	0	4									0.240876	1.32157
																														0	2	4	6	1	1	1	0									0.118911	0.3961
																														1	1	6	5	2	0	0	0									0.0911602	1.30252
																														1	1	2	5	1	3	2	2									0.256322	0.54958
																														1	1	4	7	1	3	2	2									0.276259	1.20085
																														2	3	4	10	2	2	0	3									0.255452	0.407216
																														1	2	2	9	0	3	0	4									0.345644	1.00392
																														0	2	2	8	0	1	0	1									0.17244	0.341736
																														1	2	1	8	4	0	1	3									0.251701	0.510444
																														2	3	0	7	0	4	1	3									0.202875	1.17994
																														1	1	0	2	2	3	0	2									0.297323	0.742116
																														1	1	2	8		0	1	3									0.295918	1.15026
																														1	2	2	10		0	0	2									0.506188	0.940186
																														3	0	1	10		4	1	3									0.321088	0.429389
																														1	0	3	5		2	1	2									0.287037	0.37114
																														2	0	2	8		3	2	1									0.195	0.425801
																														0	2	4	2		3	1	3									0.303089	0.434671
																														2	2	2	9		4	1	0									0.308186	0.222519
																														0	0	1	9		4	1	3									0.256048	0.560476
																														0	1	2	10		3	0	2									0.2443	0.2585
																														1	2	2	4		4	1	1									0.173267	0.569983
																														3	3		3		0	0	1									0.268382	0.268651
																														2	0		9		2	0	1									0.218919	0.337087
																														1	0		4		3	2	1									0.245536	0.52656
																														4	0		8		2	1	2									0.26412	0.258905
																														0	2		3		2	0	1									0.164075	0.653783
																														1	0		15		2	1	3									0.218085	0.267586
																														1	2		6		4	1	2									0.279698	0.60304
																														0	0		7		4	1	1									0.160617	0.597492
																														0			6		1	1	3									0.162651	1.02161
																														0			1		3	1	2									0.324873	1.03199
																														0			1		1	1	4									0.218504	0.475441
																														0			4		2	0	2									0.359266	0.660317
																														2			3		3	1	2									0.233681	0.800335
																														0			9		0	0	2									0.271404	0.255011
																														0			7		0	0	4									0.284753	0.674993
																														1			4		1	1	2									0.337456	0.405721
																														1					3	2										0.182635	0.643429
																														0					1	0										0.219477	0.671667
																														2					0	1										0.151163	1.53278
																														1					0	2										0.156593	1.42528
																														1					2	1										0.263889	0.518134
																														2					4	2										0.118421	0.221504
																														2					3	0										0.805556	0.246302
																														2					1	2										0.227366	0.334471
																														2																1.81452	0.994332
																														3																0.146	0.2943
																														3																0.223958	0.816967
																														0																0.295759	0.288365
																														0																0.131637	0.227945
																														1																0.207516	0.422723
																														0																0.132812	0.185392
																														1																0.246591	0.134103
																														0																0.260674	0.151333
																														1																0.314214	0.884191
																														0																0.248512	1.25301
																														0																0.220395	0.40638
																														2																0.241888	1.46365
																														1																0.191919	0.717238
																														2																0.260067	0.214608
																														1																0.365927	0.278488
																																														0.173797	0.725026
																																														0.275172	0.745642
																																														0.196078	0.375622
																																														0.208709	0.732044
																																														0.191048	0.260517
																																														0.192437	0.663928
																																														0.329251	0.381392
																																														0.130749	0.355305
																																														0.37344	0.497273
																																														0.289474	0.408135
																																														0.294469	0.282047
																																														0.36036	1.15019
																																														0.160714	0.29263
																																														0.0770677	1.3636
																																														0.149573	0.22872
																																														0.313131	1.61826
																																														0.245	0.484541
																																														0.190531	1.2213
																																														0.160103	1.74307
																																														0.239872	0.311509
																																														0.149254	0.609818
																																														0.427574	0.309465
																																														0.236911	0.342714
																																														0.404145	0.505511
																																														0.292411	0.47182
																																														0.146396	0.62053
																																														0.382543	0.920755
																																														0.316	0.481939
																																														0.374659	1.53607
																																														0.178138	0.243042
																																														0.171843	0.725377
																																														0.175172	1.12988
																																														0.235363	0.292325
																																														0.150741	1.1937
																																														0.611264	0.325888
																																														0.388745	0.934541
																																														0.206667	0.48707
																																														0.246459	1.59227
																																														0.138264	1.4417
																																														0.0817844	0.710268
																																														0.121974	0.895491
																																														0.158009	0.330073
																																														0.164216	0.744224
																																														0.0779221	0.579206
																																														0.208861	0.618678
																																														0.189623	0.0461331
																																														0.300654	0.108327
																																														0.265306	0.304375
																																														0.0962733	0.878724
																																														0.311377	0.267448
																																														0.158929	0.703736
																																														0.037234	1.25207
																																														0.267782	0.727293
																																														0.304391	0.39472
																																														0.38	0.23969
																																														0.204607	0.912024
																																														0.175174	0.95751
																																														0.254207	0.514314
																																														0.128924	0.87679
																																														0.315476	0.553855
																																														0.22291	0.712337
																																														0.371795	0.413547
																																														0.347368	0.942272
																																														0.168704	0.534413
																																														0.154378	0.418669
																																														0.336749	0.26159
																																														0.165049	0.41999
																																														0.25365	0.244239
																																														0.0763598	0.571563
																																														0.293963	0.322038
																																														0.328512	0.602461
																																														0.164969	0.57145
																																														0.291902	0.767395
																																														0.186695	0.324873
																																														0.363184	0.817528
																																														0.285229	0.432699
																																														0.243396	0.352363
																																														0.561024	0.39334
																																														0.325871	0.553015
																																														0.377986	0.287328
																																														0.15653	0.96996
																																														0.135246	0.577423
																																														0.191919	0.266477
																																														0.81	0.451854
																																														0.316047	0.370895
																																														0.201639	0.459156
																																														0.332982	0.373107
																																														0.138672	0.773972
																																														0.248257	0.557306
																																														0.280273	0.29612
																																														0.410455
																																														0.62844
																																														0.250583
																																														0.177817
																																														0.28442
																																														0.479381
																																														0.148036
																																														0.126915
																																														0.252809
																																														0.0736842
																																														0.19482
																																														0.432406
																																														0.352234
																																														0.208543
																																														0.300427
																																														0.264706
																																														0.224227
																																														0.240171
																																														0.258904
																																														0.325566
																																														0.254902
																																														0.110672
																																														0.395683
																																														0.578762
																																														0.47449
																																														0.234807
																																														0.235673
																																														0.143836
																																														0.369433
																																														0.276025
																																														0.153846
																																														0.227513
																																														0.360967
																																														0.381579
																																														0.171141
																																														0.21902
																																														0.294038
																																														0.0794979
																																														0.0659091
																																														0.367162
																																														0.152559
																																														0.246377
																																														0.297965
																																														0.265133
																																														0.659039
																																														0.235931
																																														0.150307
																																														0.161017
																																														0.307467
																																														0.34345
																																														0.127027
																																														0.234155
																																														0.213529
																																														0.308116
																																														0.0946502
																																														0.211364
																																														0.265734
																																														0.187234
																																														0.211221
																																														0.0681199
																																														0.219753
																																														0.121581
																																														0.282082
																																														0.0616883
																																														0.308394
																																														0.230126
																																														0.136691
																																														0.435417
																																														0.422693
																																														0.177386
																																														0.331169
																																														0.141667
																																														0.158427
																																														0.660714
																																														0.39218
																																														0.162011
																																														0.260811
																																														0.381282
																																														0.125
																																														0.2816
																																														0.223361
																																														0.206997
																																														0.158629
																																														0.245353
																																														0.195312
																																														0.143868
																																														0.194792
																																														0.147495
																																														0.298592
																																														0.225504
																																														0.373308
																																														0.152406
																																														0.35396
																																														0.241935
																																														0.198885
																																														0.0788644
																																														0.188492
																																														0.256169
																																														0.158809
																																														0.255464
																																														0.320255
																																														0.224543
																																														0.302557
																																														0.180934
																																														0.368182
																																														0.197289
																																														0.277778
																																														0.222222
																																														0.232535
																																														0.404711
																																														0.057377
																																														0.10625
																																														0.142775
																																														0.197761
																																														0.192478
																																														0.162311
																																														0.171123
																																														0.535714
																																														0.258834
																																														0.186411
																																														0.237342
																																														0.246338
																																														0.132883
																																														0.296763
																																														0.305147
																																														0.172585
																																														0.246183
																																														0.25346
																																														0.189409
																																														0.16875
																																														0.240924
																																														0.111905
																																														0.393258
																																														0.268519
																																														0.248611
																																														0.156535
																																														0.335249
																																														0.386323
																																														0.151575
																																														0.243976
																																														0.25375
																																														0.217526
																																														0.127036
																																														0.231982
																																														0.266565
																																														0.177536
																																														0.353316
																																														0.154082
																																														0.263407
																																														0.166667
																																														0.140504
																																														0.212389
																																														0.218004
																																														0.132616
																																														0.509317
																																														0.171053
																																														0.252174
																																														0.31068
																																														2.07219
																																														0.29351
																																														0.166855
																																														0.347538
																																														0.125397
																																														0.184753
																																														0.259424
																																														0.186901
																																														0.385945
																																														0.139651
																																														0.191558
																																														0.192424
																																														0.22113
																																														0.243792
																																														0.178261
																																														0.331887
																																														0.144578
																																														0.176862
																																														0.217054
																																														0.710066
																																														0.18
																																														0.209783
																																														0.322715
																																														0.257827
																																														0.362429
																																														0.254058
																																														0.217866
																																														0.190141
																																														0.138376
																																														0.266667
																																														0.397207
																																														0.508734
																																														0.352357
																																														0.13151
																																														0.150495
																																														0.161932
																																														0.101036
																																														0.419014
																																														0.242925
																																														0.368159
																																														0.102159
																																														0.16568
																																														0.414495
																																														0.192446
																																														0.131579
																																														0.155556
																																														0.351375
																																														0.240691
																																														0.469929
																																														0.381476
																																														0.211888
																																														0.263969
																																														0.165644
																																														0.340323
																																														0.21547
																																														0.327354
																																														0.296992
																																														0.0704698
																																														0.1841
																																														0.214286
																																														0.137317
																																														0.341667
																																														0.220039
																																														0.155367
																																														0.200348
																																														0.206568
																																														0.113757
																																														0.0714286
																																														0.394399
																																														0.499046
																																														0.212598
																																														0.210092
																																														0.258286
																																														0.205521
																																														0.207018
																																														0.337349
																																														0.389978
																																														0.306563
																																														0.350917
																																														0.337778
																																														0.141408
																																														0.27551
																																														0.295858
																																														0.142734
																																														0.33002
																																														0.200434
																																														0.056391
																																														0.194549
																																														0.133531
																																														0.153199
																																														0.290643
																																														0.188525
																																														0.158287
																																														0.349367
																																														0.21705
																																														0.456215
																																														0.254801
																																														0.182278
																																														0.492091
																																														0.223301
																																														0.309668
																																														0.160526
																																														0.185294
																																														0.206818
																																														0.125693
																																														0.0868687
																																														0.179144
																																														0.111667
																																														0.132791
																																														0.190705
																																														0.257246
																																														0.227626
																																														0.29595
																																														0.153571
																																														0.160377
																																														0.529255
																																														0.126404
																																														0.133929
																																														0.296875
																																														0.366388
																																														0.059375
																																														0.353026
																																														0.323636
																																														0.237089
																																														0.287476
																																														0.28169
																																														0.177835
																																														0.353728
																																														0.201627
																																														0.142257
																																														0.277465
																																														0.19837
																																														0.370647
																																														0.154723
																																														0.214041
																																														0.0611855
																																														0.25
																																														0.106407
																																														0.135889
																																														0.190096
																																														0.202128
																																														0.17438
																																														0.145131
																																														0.181628
																																														0.285347
																																														0.254613
																																														0.0931559
																																														0.239619
																																														0.267782
																																														0.438871
																																														0.222345
																																														0.132732
																																														0.302432
																																														0.137931
																																														0.178822
																																														0.261317
																																														0.122807
																																														0.343385
																																														0.24055
																																														0.143312
																																														0.137518
																																														0.192691
																																														0.699336
																																														0.23927
																																														0.130137
																																														0.2125
																																														0.381944
																																														0.274566
																																														0.492635
																																														0.375635
																																														0.404269
																																														0.175732
																																														0.2875
																																														0.190846
																																														0.950626
																																														0.257188
																																														0.19657
																																														0.208249
																																														0.150259
																																														0.297424
																																														0.283394
																																														0.265625
																																														0.176407
																																														0.158009
																																														0.205882
																																														0.337687
																																														0.146269
																																														0.14411
																																														0.221053
																																														0.185268
																																														0.171733
																																														0.251834
																																														0.1983
																																														0.23731
																																														0.276952
																																														0.252564
																																														0.327247
																																														0.0611979
																																														0.295571
																																														0.370536
																																														0.386555
																																														0.215013
																																														0.167131
																																														0.280263
																																														0.289954
																																														0.337838
																																														0.448911
																																														0.311475
																																														0.172249
																																														0.106607
																																														0.0819672
																																														0.29898
																																														0.313559
																																														0.246649
																																														0.325153
																																														0.164234
																																														0.237583
																																														0.162231
																																														0.0816619
																																														0.157807
																																														0.248841
																																														0.310231
																																														0.222039
																																														0.100564
																																														0.244395
																																														0.196429
																																														0.495927
																																														0.263514
																																														0.257353
																																														0.135965
																																														0.23088
																																														0.234463
																																														0.289394
																																														0.12212
																																														0.15
																																														0.178423
																																														0.39196
																																														0.160156
																																														0.122222
																																														0.1875
																																														0.137626
																																														0.462316
																																														0.152034
																																														0.200658
																																														0.0839329
																																														0.460836
																																														0.199531
																																														0.237044
																																														0.245205
																																														0.328962
																																														0.325377
																																														0.146739
																																														0.121951
																																														0.405405
																																														0.292074
																																														0.113445
																																														0.41906
																																														0.225152
																																														0.192913
																																														0.385983
																																														0.217655
																																														0.15119
																																														0.629237
																																														0.141732
																																														0.516807
																																														0.308489
																																														0.195378
																																														0.305808
																																														0.258503
																																														0.159535
																																														0.116114
																																														0.188752
																																														0.159824
																																														0.117925
																																														0.338473
																																														0.240319
																																														0.168172
																																														0.276087
																																														0.297143
																																														0.273519
																																														0.0871369
																																														0.261986
																																														0.359764
																																														0.121429
																																														0.0693069
																																														0.0687919
																																														0.342857
																																														0.24024
																																														0.269231
																																														0.17382
																																														0.271552
																																														0.2207
																																														0.214286
																																														0.201789
																																														0.166667
																																														0.161376
																																														0.325243
																																														0.175272
																																														0.119718
																																														0.283784
																																														0.228261
																																														0.244344
																																														0.243976
																																														0.0877863
																																														0.158451
																																														0.189591
																																														0.34904
																																														0.290503
																																														0.383146
																																														0.171355
																																														0.25
																																														0.118664
																																														0.217172
																																														0.0795455
																																														0.287879
																																														0.172973
																																														0.30622
																																														0.177966
																																														0.518006
																																														0.18241
																																														0.193478
																																														0.222816
																																														0.139252
																																														0.172222
																																														0.230248
																																														0.184066
																																														0.353535
																																														0.138122
																																														0.130542
																																														0.120823
																																														0.428947
																																														0.273381
																																														0.124601
																																														0.228088
																																														0.340116
																																														0.313178
																																														0.382442
																																														0.217345
																																														0.156992
																																														0.195538
																																														0.170901
																																														0.331683
																																														1.19134
																																														0.165644
																																														0.112948
																																														0.237303
																																														0.341856
																																														0.128458
																																														0.560892
																																														0.305931
																																														0.390845
																																														0.09375
																																														0.276256
																																														0.151361
																																														0.140777
																																														0.279343
																																														0.195026
																																														0.147727
																																														0.231818
																																														0.175824
																																														0.156436
																																														0.0769231
																																														0.204774
																																														0.124088
																																														0.216357
																																														0.406404
																																														0.386728
																																														0.173913
																																														0.0600962
																																														0.216617
																																														0.0895522
																																														0.384422
																																														0.195556
																																														0.17517
																																														0.113393
																																														0.195614
																																														0.0325671
																																														0.365471
																																														0.181694
																																														0.248555
																																														0.14268
																																														0.11194
																																														0.314879
																																														0.302947
																																														0.241228
																																														0.099839
																																														0.15861
																																														0.279885
																																														0.251238
																																														0.244762
																																														0.100683
																																														0.243902
																																														1.01765
																																														0.262887
																																														0.399734
																																														0.366397
																																														0.111486
																																														0.26127
																																														0.254
																																														0.304502
																																														0.25513
																																														0.211957
																																														0.327991
																																														0.202041
																																														0.23
																																														0.150579
																																														0.197704
																																														0.348921
																																														0.130747
																																														0.154472
																																														0.171171
																																														0.250953
																																														0.172583
																																														0.150442
																																														0.0798969
																																														0.354497
																																														0.257576
																																														0.158009
																																														0.22929
																																														0.165138
																																														0.25
																																														0.244444
																																														0.214286
																																														0.234501
																																														0.0828947
																																														0.208889
																																														0.271875
																																														0.346793
																																														0.260077
																																														0.383534
																																														0.220049
																																														0.181303
																																														0.172414
																																														0.246835
																																														0.133858
																																														0.392938
																																														0.1826
																																														0.150602
																																														0.208571
																																														0.241814
																																														0.119107
																																														0.205516
																																														0.0604651
																																														0.241742
																																														0.219298
																																														0.0606061
																																														0.106205
																																														0.193684
																																														0.198551
																																														0.567797
																																														0.0714286
																																														0.0909091
																																														0.0874126
																																														0.137584
																																														0.0974155
																																														0.265568
																																														0.200669
																																														0.106452
																																														0.307692
																																														0.275
																																														0.153439
																																														0.328982
																																														0.167021
																																														0.305621
																																														0.289216
																																														0.274319
																																														0.137124
																																														0.0642702
																																														0.137907
																																														0.278607
																																														0.128151
																																														0.387906
																																														0.191304
																																														0.218401
																																														0.354586
																																														0.292308
																																														0.108382
																																														0.117204
																																														0.137134
																																														0.304348
																																														0.279904
																																														0.182831
																																														0.189394
																																														0.133245
																																														0.0623557
																																														0.394256
																																														0.227273
																																														0.103053
																																														0.123636
																																														0.139506
																																														0.445008
																																														0.380309
																																														0.159677
																																														0.244118
																																														0.142694
																																														0.169014
																																														0.223108
																																														0.126238
																																														0.327231
																																														0.269752
																																														0.142089
																																														0.145722
																																														0.0986395
																																														0.275934
																																														0.225728
																																														0.296392
																																														0.180162
																																														0.205788
																																														0.0693277
																																														0.213663
																																														0.221854
																																														0.220627
																																														0.2
																																														0.104106
																																														0.0611702
																																														0.185065
																																														0.215896
																																														0.226608
																																														0.192416
																																														0.182292
																																														0.327511
																																														0.25
																																														0.0689655
																																														0.162162
																																														0.788462
																																														0.154506
																																														0.116915
																																														0.312057
																																														0.14172
																																														0.1
																																														0.273936
																																														0.304974
																																														0.684825
																																														0.349727
																																														0.147673
																																														0.181973
																																														0.159722
																																														0.200361
																																														0.392857
																																														0.128307
																																														0.163265
																																														0.604444
																																														0.121083
																																														0.157767
																																														0.208182
																																														0.565854
																																														0.172043
																																														0.244802
																																														0.217391
																																														0.0793269
																																														0.294521
																																														0.225671
																																														0.336538
																																														0.277778
																																														0.15618
																																														0.371514
																																														0.174242
																																														0.236979
																																														0.27897
																																														0.185714
																																														0.127072
																																														0.167464
																																														0.0859375
																																														0.389071
																																														0.371622
																																														0.142857
																																														0.113537
																																														0.301822
																																														0.144558
																																														0.141643
																																														0.24569
																																														0.27923
																																														0.353033
																																														0.218801
																																														0.14308
																																														0.255801
																																														0.242466
																																														0.139831
																																														0.313981
																																														0.305882
																																														0.195364
																																														0.144351
																																														0.213974
																																														0.494475
																																														0.145646
																																														0.222527
																																														0.247878
																																														0.198113
																																														0.225738
																																														0.213788
																																														0.150995
																																														0.22973
																																														0.271429
																																														0.118454
																																														0.163077
																																														0.125414
																																														0.131915
																																														0.243734
																																														0.220126
																																														0.199752
																																														0.144444
																																														0.316894
																																														0.242038
																																														0.756452
																																														0.148492
																																														0.34005
																																														0.18616
																																														0.108844
																																														0.118545
																																														0.174242
																																														0.239437
																																														0.221429
																																														0.158228
																																														0.454984
																																														0.234597
																																														0.222543
																																														0.093
																																														0.165689
																																														0.299197
																																														0.121245
																																														0.180851
																																														0.191257
																																														0.259207
																																														0.165064
																																														0.122047
																																														0.132319
																																														0.23221
																																														0.369427
																																														0.213235
																																														0.177225
																																														0.114007
																																														0.17663
																																														0.305556
																																														0.195153
																																														0.190341
																																														0.223529
																																														0.246362
																																														0.281106
																																														0.290667
																																														0.204082
																																														0.0881743
																																														0.0691244
																																														0.132353
																																														0.20977
																																														0.296642
																																														0.165037
																																														0.470703
																																														0.191358
																																														0.221548
																																														0.139423
																																														0.132812
																																														0.321561
																																														0.337621
																																														0.210106
																																														0.104598
																																														0.159341
																																														0.240637
																																														0.156667
																																														0.281414
																																														0.141892
																																														0.123239
																																														0.323338
																																														0.308345
																																														0.387719
																																														0.21197
																																														0.304598
																																														0.210366
																																														0.257143
																																														0.143443
																																														0.0840708
																																														0.287736
																																														0.0912621
																																														0.384977
																																														0.160294
																																														0.248322
																																														0.205028
																																														0.184109
																																														0.181925
																																														0.406667
																																														0.136508
																																														0.438776
																																														0.164157
																																														0.0957854
																																														0.22967
																																														0.250909
																																														0.176316
																																														0.262911
																																														0.11516
																																														0.224444
																																														0.237443
																																														0.140569
																																														0.328442
																																														0.0973558
																																														0.0814607
																																														0.208955
																																														0.221212
																																														0.174377
																																														0.147727
																																														0.265957
																																														0.41543
																																														0.12959
																																														0.293981
																																														0.247544
																																														0.254587
																																														0.355682
																																														0.302041
																																														0.223744
																																														0.321782
																																														0.596008
																																														0.378616
																																														0.224206
																																														0.185965
																																														0.212042
																																														0.364865
																																														0.275862
																																														0.126984
																																														0.165685
																																														0.126761
																																														0.232212
																																														0.182692
																																														0.110909
																																														0.164336
																																														0.178423
																																														0.17381
																																														0.528689
																																														0.182043
																																														0.168342
																																														0.220833
																																														0.266089
																																														0.209091
																																														0.161215
																																														0.15873
																																														0.223005
																																														0.316143
																																														0.147273
																																														0.295455
																																														0.166113
																																														0.129573
																																														0.142327
																																														0.277512
																																														0.530888
																																														0.153527
																																														0.348769
																																														0.281116
																																														0.114516
																																														0.277202
																																														0.197727
																																														0.175926
																																														0.0479452
																																														0.16777
																																														0.217822
																																														0.34555
																																														0.192079
																																														0.219565
																																														0.0813953
																																														0.0793991
																																														0.118577
																																														0.160227
																																														0.187225
																																														0.227011
																																														0.119266
																																														0.168478
																																														0.386878
																																														0.0919355
																																														0.263672
																																														0.211236
																																														0.205882
																																														0.119718
																																														0.319728
																																														0.192857
																																														0.277551
																																														0.322967
																																														0.247685
																																														0.0833333
																																														0.114362
																																														0.227829
																																														0.233607
																																														0.294416
																																														0.183727
																																														0.27957
																																														0.0815789
																																														0.164141
																																														0.184478
																																														0.126179
																																														0.289402
																																														0.374183
																																														0.240625
																																														0.337529
																																														0.110902
																																														0.156542
																																														0.169456
																																														0.202229
																																														0.186424
																																														0.15873
																																														0.208556
																																														0.0958466
																																														0.148193
																																														0.159653
																																														0.204062
																																														0.320327
																																														0.35559
																																														0.338028
																																														0.196884
																																														0.241259
																																														0.237252
																																														0.0845324
																																														0.187783
																																														0.301205
																																														0.0916667
																																														0.136555
																																														0.202532
																																														0.0863095
																																														0.380405
																																														0.445513
																																														0.162195
																																														0.2631
																																														0.0903614
																																														0.215017
																																														0.240385
																																														0.127604
																																														0.161337
																																														0.0925
																																														0.0833333
																																														0.148208
																																														0.199063
																																														0.116379
																																														0.15859
																																														0.200692
																																														0.173171
																																														0.235669
																																														0.424925
																																														0.1
																																														0.197605
																																														0.0857741
																																														0.217224
																																														0.235849
																																														0.377598
																																														0.124615
																																														0.087931
																																														0.35968
																																														0.241477
																																														0.238971
																																														0.317416
																																														0.170659
																																														0.201737
																																														0.131649
																																														0.424901
																																														0.15367
																																														0.0907692
																																														0.126667
																																														0.2184
																																														0.0960145
																																														0.418216
																																														0.257302
																																														0.327485
																																														0.19881
																																														0.334471
																																														0.178439
																																														0.179849
																																														0.214103
																																														0.241803
																																														0.110759
																																														0.283198
																																														0.323222
																																														0.160326
																																														0.0717054
																																														0.111301
																																														0.174528
																																														0.167568
																																														0.248397
																																														0.226786
																																														0.257143
																																														0.231266
																																														0.207219
																																														0.137993
																																														0.208494
																																														0.134298
																																														0.14
																																														0.125
																																														0.268644
																																														0.127907
																																														0.36965
																																														0.0965347
																																														0.351662
																																														0.11588
																																														0.305825
																																														0.252556
																																														0.26204
																																														0.16821
																																														0.341379
																																														0.131423
																																														0.142857
																																														0.217439
																																														0.27561
																																														0.116667
																																														0.150943
																																														0.54878
																																														0.341014
																																														0.0949119
																																														0.187032
																																														0.190184
																																														0.285956
																																														0.206468
																																														0.207692
																																														0.34154
																																														0.339552
																																														0.338115
																																														0.243728
																																														0.240351
																																														0.240044
																																														0.181416
																																														0.228337
																																														0.252236
																																														0.700658
																																														0.184584
																																														0.20471
																																														0.104348
																																														0.0962264
																																														0.290191
																																														0.141479
																																														0.175
																																														0.196429
																																														0.189453
																																														0.179039
																																														0.347432
																																														0.10214
																																														0.303863
																																														0.248788
																																														0.0816832
																																														0.321663
																																														0.147059
																																														0.174931
																																														0.135802
																																														0.168622
																																														0.16185
																																														0.172489
																																														0.0478548
																																														0.123989
																																														0.256881
																																														0.0645933
																																														0.204128
																																														0.116343
																																														0.0811966
																																														0.244304
																																														0.483871
																																														0.147856
																																														0.150926
																																														0.205298
																																														0.192503
																																														0.132812
																																														0.394444
																																														0.0714286
																																														0.23619
																																														0.301255
																																														0.203327
																																														0.241993
																																														0.178439
																																														0.264095
																																														0.0723684
																																														0.114833
																																														0.340062
																																														0.122727
																																														0.189815
																																														0.259434
																																														0.320728
																																														0.252525
																																														0.181614
																																														0.205637
																																														0.147849
																																														0.297075
																																														0.279188
																																														0.184751
																																														0.109375
																																														0.162037
																																														0.119342
																																														0.127068
																																														0.14631
																																														0.208428
																																														0.142308
																																														0.165605
																																														0.147744
																																														0.239011
																																														0.0842391
																																														0.24767
																																														0.0898438
																																														0.283688
																																														0.367347
																																														0.212803
																																														0.253817
																																														0.282389
																																														0.108434
																																														0.260656
																																														0.16573
																																														0.160929
																																														0.170118
																																														0.138356
																																														0.481289
																																														0.294372
																																														0.262402
																																														0.185673
																																														0.110517
																																														0.101626
																																														0.215976
																																														0.15
																																														0.334081
																																														0.122302
																																														0.200288
																																														0.11465
																																														0.197652
																																														0.128889
																																														0.159016
																																														0.258459
																																														0.15445
																																														0.301418
																																														0.207763
																																														0.110039
																																														0.193005
																																														0.235849
																																														0.198171
																																														0.166667
																																														0.200426
																																														0.19863
																																														0.245455
																																														0.21956
																																														0.209607
																																														0.318391
																																														0.215517
																																														0.187984
																																														0.195122
																																														0.334437
																																														0.175532
																																														0.4
																																														0.0797546
																																														0.088843
																																														0.222603
																																														0.122059
																																														0.198944
																																														0.0793919
																																														0.0924658
																																														0.196104
																																														0.0566502
																																														0.334805
																																														0.160121
																																														0.238275
																																														0.123737
																																														0.259109
																																														0.331034
																																														0.198241
																																														0.39418
																																														0.236967
																																														0.290541
																																														0.226821
																																														0.197674
																																														0.258303
																																														0.598214
																																														0.133201
																																														0.360277
																																														0.11041
																																														0.155941
																																														0.108889
																																														0.307065
																																														0.028757
																																														0.254682
																																														0.104651
																																														0.187609
																																														0.0609137
																																														0.0934256
																																														0.186523
																																														0.338068
																																														0.402344
																																														0.0959032
																																														0.186649
																																														0.71063
																																														0.133523
																																														0.196532
																																														0.143123
																																														0.221939
																																														0.110841
																																														0.344037
																																														0.171429
																																														0.243772
																																														0.153141
																																														0.177239
																																														0.0645756
																																														0.368324
																																														0.265845
																																														0.181529
																																														0.356557
																																														0.273333
																																														0.208183
																																														0.280323
																																														0.142066
																																														0.0973597
																																														0.16258
																																														0.226852
																																														0.219723
																																														0.214176
																																														0.43299
																																														0.218056
																																														0.326613
																																														0.136879
																																														0.197279
																																														0.131356
																																														0.057971
																																														0.149402
																																														0.195531
																																														0.362
																																														0.116337
																																														0.348485
																																														0.121901
																																														0.14688
																																														0.26087
																																														0.120087
																																														0.343478
																																														0.370853
																																														0.103704
																																														0.153061
																																														0.429339
																																														0.169118
																																														0.0922819
																																														1.13736
																																														0.215909
																																														0.202083
																																														0.109252
																																														0.0967742
																																														0.0780731
																																														0.105096
																																														0.1
																																														0.19125
																																														0.241453
																																														0.216406
																																														0.209251
																																														0.332967
																																														0.253579
																																														0.188202
																																														0.245763
																																														0.277778
																																														0.095
																																														0.307487
																																														0.445578
																																														0.10397
																																														0.646789
																																														0.183775
																																														0.178571
																																														0.11553
																																														0.202479
																																														0.420408
																																														0.103234
																																														0.450147
																																														0.215278
																																														0.1675
																																														0.16792
																																														0.184959
																																														0.344633
																																														0.1325
																																														0.149275
																																														0.192913
																																														0.235507
																																														0.136194
																																														0.16122
																																														0.335616
																																														0.202857
																																														0.0422535
																																														0.195214
																																														0.153846
																																														0.157821
																																														0.0847826
																																														0.103321
																																														0.158621
																																														0.080292
																																														0.26
																																														0.169231
																																														0.0957854
																																														0.1727
																																														0.184783
																																														0.159722
																																														0.114583
																																														0.27568
																																														0.22973
																																														0.25723
																																														0.298507
																																														0.164452
																																														0.0927948
																																														0.253138
																																														0.140476
																																														0.413462
																																														0.0648649
																																														0.190994
																																														0.30531
																																														0.203476
																																														0.0656863
																																														0.257764
																																														0.12029
																																														0.186047
																																														0.158377
																																														0.142857
																																														0.108731
																																														0.18795
																																														0.345455
																																														0.160057
																																														0.175214
																																														0.154412
																																														0.309269
																																														0.143454
																																														0.17402
																																														0.113971
																																														0.0940959
																																														0.106419
																																														0.258865
																																														0.10452
																																														0.208207
																																														0.0828729
																																														0.12037
																																														0.180608
																																														0.141304
																																														0.179803
																																														0.174133
																																														0.205144
																																														0.106918
																																														0.136299
																																														0.213675
																																														0.250577
																																														0.133159
																																														0.117188
																																														0.438312
																																														0.0915179
																																														0.177419
																																														0.209091
																																														0.15928
																																														0.180608
																																														0.171123
																																														0.435007
																																														0.391051
																																														0.358311
																																														0.141129
																																														0.158621
																																														0.14433
																																														0.335196
																																														0.152299
																																														0.260825
																																														0.121622
																																														0.150926
																																														0.163618
																																														0.0603448
																																														0.207506
																																														0.111332
																																														0.233333
																																														0.131429
																																														0.295732
																																														0.109091
																																														0.206522
																																														0.130045
																																														0.180851
																																														0.160083
																																														0.130879
																																														0.139401
																																														0.144422
																																														0.161337
																																														0.268349
																																														0.163014
																																														0.206186
																																														0.205882
																																														0.15016
																																														0.255859
																																														0.145695
																																														0.149733
																																														0.162097
																																														0.260073
																																														0.24147
																																														0.13941
																																														0.116719
																																														0.260766
																																														0.210526
																																														0.52027
																																														0.130728
																																														0.242604
																																														0.135802
																																														0.336694
																																														0.107656
																																														0.207278
																																														0.158451
																																														0.197248
																																														0.281818
																																														0.131667
																																														0.140306
																																														0.10166
																																														0.185874
																																														0.1875
																																														0.136888
																																														0.398374
																																														0.753472
																																														0.159664
																																														0.280303
																																														0.19206
																																														0.511111
																																														0.188889
																																														0.174912
																																														0.165858
																																														0.210297
																																														0.297505
																																														0.263369
																																														0.254
																																														0.110497
																																														0.1875
																																														0.103053
																																														0.232584
																																														0.184109
																																														0.210345
																																														0.340796
																																														0.125
																																														0.151544
																																														0.246855
																																														0.246171
																																														0.171739
																																														0.066474
																																														0.301047
																																														0.108696
																																														0.226027
																																														0.0976801
																																														0.4125
																																														0.120553
																																														0.298507
																																														0.580838
																																														0.567308
																																														0.151807
																																														0.568889
																																														0.13285
																																														0.3
																																														0.269118
																																														0.12963
																																														0.0635179
																																														0.267857
																																														0.209497
																																														0.0460123
																																														0.179688
																																														0.333721
																																														0.186131
																																														0.163664
																																														0.228261
																																														0.0676471
																																														0.228604
																																														0.10567
																																														0.209581
																																														0.214744
																																														0.0254545
																																														0.132867
																																														0.0755814
																																														0.0651042
																																														0.139706
																																														0.10678
																																														0.319124
																																														0.125
																																														0.194937
																																														0.162562
																																														0.178977
																																														0.165722
																																														0.25102
																																														0.155
																																														0.220986
																																														0.205
																																														0.19469
																																														0.136574
																																														0.192782
																																														0.148148
																																														0.103839
																																														0.11368
																																														0.213333
																																														0.252016
																																														0.128028
																																														0.171875
																																														0.344937
																																														0.270833
																																														0.151087
																																														0.234266
																																														0.089372
																																														0.102902
																																														0.213277
																																														0.0687204
																																														0.145455
																																														0.181287
																																														0.162021
																																														0.338129
																																														0.18956
																																														0.612245
																																														0.16875
																																														0.0760369
																																														0.254011
																																														0.267202
																																														0.282158
																																														0.209607
																																														0.191643
																																														0.141556
																																														0.397436
																																														0.207547
																																														0.52649
																																														0.188854
																																														0.111607
																																														0.338636
																																														0.440594
																																														0.210156
																																														0.196507
																																														0.274026
																																														0.350418
																																														0.234848
																																														0.268707
																																														0.304575
																																														0.41623
																																														0.219512
																																														0.172515
																																														0.146907
																																														0.160227
																																														0.153285
																																														0.254587
																																														0.248963
																																														0.290741
																																														0.303361
																																														0.0562914
																																														0.148325
																																														0.170274
																																														0.224057
																																														0.312133
																																														0.237383
																																														0.117871
																																														0.0881148
																																														0.146875
																																														0.0995261
																																														0.153139
																																														0.267442
																																														0.128531
																																														1.29075
																																														0.111913
																																														0.182331
																																														0.0851528
																																														0.358209
																																														0.195187
																																														0.158793
																																														0.114458
																																														0.064
																																														0.105263
																																														0.145265
																																														0.276316
																																														0.306069
																																														0.598361
																																														0.139037
																																														0.250905
																																														0.188571
																																														0.206693
																																														0.159794
																																														0.110849
																																														0.190722
																																														0.332707
																																														0.240909
																																														0.0753138
																																														0.194301
																																														0.264563
																																														0.13
																																														0.341463
																																														0.118012
																																														0.176707
																																														0.295752
																																														0.144172
																																														0.202035
																																														0.12585
																																														0.164013
																																														0.157534
																																														0.336898
																																														0.232673
																																														0.176976
																																														0.0605096
																																														0.0496454
																																														0.174419
																																														0.18018
																																														0.216718
																																														0.178808
																																														0.644444
																																														0.104592
																																														0.14939
																																														0.184615
																																														0.157718
																																														0.177778
																																														0.113636
																																														0.17354
																																														0.197802
																																														0.286392
																																														0.111607
																																														0.300587
																																														0.211667
																																														0.107735
																																														0.156863
																																														0.0830946
																																														0.192607
																																														0.11516
																																														0.166667
																																														0.25641
																																														0.257911
																																														0.220497
																																														0.212522
																																														0.136816
																																														0.217647
																																														0.313596
																																														0.176871
																																														0.1
																																														0.182598
																																														0.212903
																																														0.0961123
																																														0.173709
																																														0.156977
																																														0.178125
																																														0.161702
																																														0.202797
																																														0.317536
																																														0.11236
																																														0.249267
																																														0.185294
																																														0.201456
																																														0.164032
																																														0.173529
																																														0.329154
																																														0.241895
																																														0.25419
																																														0.324903
																																														0.204403
																																														0.1375
																																														0.644231
																																														0.251908
																																														0.322581
																																														0.0733945
																																														0.114094
																																														0.209402
																																														0.153689
																																														0.252525
																																														0.148325
																																														0.113439
																																														0.0955414
																																														0.182903
																																														0.152074
																																														0.417284
																																														0.152495
																																														0.611111
																																														0.191489
																																														0.132455
																																														0.308824
																																														0.340074
																																														0.0928854
																																														0.176667
																																														0.572656
																																														0.239617
																																														0.210784
																																														0.462766
																																														0.300207
																																														0.313776
																																														0.131295
																																														0.286706
																																														0.427083
																																														0.146186
																																														0.283231
																																														0.184932
																																														0.101036
																																														0.330325
																																														0.149573
																																														0.387879
																																														0.110849
																																														0.194767
																																														0.238248
																																														0.344221
																																														0.0931677
																																														0.153631
																																														0.316265
																																														0.189441
																																														0.223757
																																														0.290179
																																														0.0940594
																																														0.154596
																																														0.133416
																																														0.201613
																																														0.28481
																																														0.207831
																																														0.1416
																																														0.0717213
																																														0.314961
																																														0.280576
																																														0.0747826
																																														0.224138
																																														0.0694444
																																														0.337037
																																														0.514286
																																														0.364583
																																														0.166667
																																														0.300766
																																														0.193396
																																														0.196154
																																														0.156934
																																														0.150433
																																														0.126866
																																														0.131373
																																														0.17432
																																														0.249337
																																														0.0974026
																																														0.143805
																																														0.0717092
																																														0.251527
																																														0.140777
																																														0.147959
																																														0.2875
																																														0.326367
																																														0.108392
																																														0.282383
																																														0.12004
																																														0.311012
																																														0.144385
																																														0.178977
																																														0.187919
																																														0.0818584
																																														0.0521236
																																														0.269231
																																														0.14881
																																														0.151079
[truncated: 6,397 more rows]
[truncated: 3 more columns]
