# Supplementary material for: Low-level repressive histone marks fine-tune gene transcription in neural stem cells
Source: eLife. 2023 Jun 14;12:e86127. doi: 10.7554/eLife.86127 (PMC10344426; doi:10.7554/eLife.86127)
Supplement: Supplementary file 2. [file elife-86127-supp2.xlsx]

## Sheet: Sheet1
	names	scores	logfoldchanges	pvals	pvals_adj
0	Syp	14.4939	2.13596	4.96283e-34	1.67231e-30
1	Hsp23	11.7652	4.31496	1.14937e-23	1.45238e-20
2	hth	11.7138	5.28064	8.93043e-26	2.25694e-22
3	vvl	11.5067	5.28663	3.14745e-25	5.30294e-22
4	Tpi	11.2583	4.77357	2.26247e-24	3.26733e-21
5	fru	11.0885	5.94648	2.96575e-22	2.99808e-19
6	Pglym78	11.0231	6.35663	1.0987e-21	8.54367e-19
7	Gapdh1	10.7816	4.03897	5.39273e-22	4.95592e-19
8	dpn	10.4086	5.02713	4.56186e-21	3.29399e-18
9	CG42342	8.44785	3.78855	2.46661e-15	7.55604e-13
10	GstD1	8.40259	4.39032	4.92154e-15	1.42148e-12
11	PyK	7.98564	3.85065	5.0196e-14	1.30111e-11
12	olf413	7.8296	3.93883	1.65685e-13	3.98788e-11
13	Hsp67Ba	7.69555	4.19674	5.65761e-13	1.33006e-10
14	CG10939	7.44548	4.08622	2.67772e-12	6.01534e-10
15	Cam	7.2386	0.587286	4.81913e-12	1.05906e-09
16	heph	6.96209	2.81451	2.93633e-11	5.2076e-09
17	CG9993	6.90356	3.08649	3.57553e-11	6.12628e-09
18	Eno	6.89812	1.6618	7.86704e-11	1.30374e-08
19	grh	6.66861	2.68637	1.97663e-10	3.12214e-08
20	Ran	6.65103	0.615036	2.17755e-10	3.38659e-08
21	CG46301	6.64448	3.18177	1.67615e-10	2.68955e-08
22	BthD	6.47931	3.08385	4.46171e-10	6.63285e-08
23	stau	6.45819	3.20198	5.0992e-10	7.4707e-08
24	Rtnl1	6.37474	2.96928	7.90149e-10	1.08361e-07
25	Gapdh2	6.23299	3.05743	1.86754e-09	2.48408e-07
26	jigr1	6.0667	2.13486	5.45852e-09	6.27048e-07
27	UQCR-Q	5.97745	1.41459	8.0017e-09	9.02282e-07
28	Taldo	5.86662	2.52131	1.30655e-08	1.34774e-06
29	zld	5.8574	2.69591	1.35378e-08	1.38236e-06
30	Oatp74D	5.81431	3.27802	2.14784e-08	2.10801e-06
31	H	5.69486	2.64608	3.20895e-08	2.97608e-06
32	sqz	5.60518	3.43363	7.01601e-08	5.9104e-06
33	nab	5.60208	2.87016	5.6999e-08	4.92481e-06
34	Tspo	5.45917	2.90655	1.22491e-07	9.59889e-06
35	CG43759	5.45627	2.64822	1.11804e-07	8.89938e-06
36	Lk6	5.44685	1.42968	1.23552e-07	9.60763e-06
37	noc	5.38165	2.58692	1.60672e-07	1.22123e-05
38	SKIP	5.293	2.4421	2.4813e-07	1.77897e-05
39	fabp	5.2028	0.78441	5.19699e-07	3.34626e-05
40	His3.3A	5.15269	0.37509	5.09672e-07	3.30274e-05
41	Mob2	5.121	2.62208	6.119e-07	3.81833e-05
42	Hsp27	5.12013	1.05075	5.99209e-07	3.77471e-05
43	spen	5.01788	1.16027	1.0543e-06	6.14216e-05
44	PRL-1	4.97621	2.38069	1.15463e-06	6.63192e-05
45	CG17776	4.76414	2.34913	3.13804e-06	0.000155968
46	Dscam4	4.72213	2.68561	4.13587e-06	0.000196096
47	CG43131	4.68073	3.50701	5.61175e-06	0.000255537
48	wdp	4.65971	2.41765	5.14943e-06	0.000239888
49	l(3)neo38	4.64432	1.4005	5.37251e-06	0.00024575
50	cv-c	4.63178	3.35391	6.82641e-06	0.000301346
51	tll	4.59727	3.69794	8.2451e-06	0.00034442
52	Pp4-19C	4.55373	2.11913	7.96088e-06	0.000335319
53	mEFTs	4.53558	2.12519	8.62322e-06	0.000357263
54	CD98hc	4.48285	2.18081	1.09468e-05	0.000426283
55	Pen	4.44676	0.642017	1.27331e-05	0.000485733
56	CG6180	4.4431	2.21163	1.30515e-05	0.00049148
57	pnt	4.37438	1.65096	1.74916e-05	0.000640662
58	px	4.36816	2.22814	1.82873e-05	0.000667386
59	asp	4.34875	2.15587	1.94508e-05	0.000697264
60	GlyP	4.3167	2.43032	2.35146e-05	0.000808533
61	CG42260	4.29493	2.68666	2.66296e-05	0.000900218
62	mas	4.27786	3.59366	3.10077e-05	0.00102103
63	Act5C	4.24796	0.830996	3.20908e-05	0.00104986
64	flfl	4.21519	1.69734	3.40844e-05	0.00109732
65	CG3566	4.19211	2.27805	3.89641e-05	0.00122325
66	GstO2	4.18788	1.8028	3.81056e-05	0.00120755
67	hpRNA:CR33940	4.17589	1.98289	4.00583e-05	0.00124985
68	Ts	4.16928	2.57578	4.41021e-05	0.00135099
69	svp	4.15819	2.73537	4.75599e-05	0.00143947
70	PCNA	4.15693	1.93266	4.32584e-05	0.00133323
71	CG42394	4.12063	2.12712	5.12386e-05	0.00152794
72	Gdh	4.05551	2.04224	6.61588e-05	0.00189462
73	CG14545	4.00905	2.025	7.93289e-05	0.00220312
74	His1:CG33801	4.00636	3.43567	9.09308e-05	0.00245781
75	CG11562	4.00563	2.24599	8.26026e-05	0.00228775
76	Six4	3.99269	2.01421	8.44464e-05	0.00230838
77	babos	3.98259	2.38643	9.23308e-05	0.00246924
78	Pgi	3.96488	2.32513	9.87213e-05	0.00263317
79	AGBE	3.96192	3.21334	0.000106574	0.00278874
80	Eip93F	3.94941	2.05892	0.000101383	0.00268292
81	tefu	3.93894	2.32659	0.000108537	0.00282058
82	Tmhs	3.9365	2.34693	0.00011024	0.00285747
83	msd1	3.93647	2.00772	0.000105822	0.00277882
84	CLIP-190	3.91624	1.93057	0.000114156	0.00294389
85	PsGEF	3.91207	2.10029	0.00011853	0.0030258
86	mt:lrRNA	3.85258	0.284221	0.000147185	0.00363788
87	Pgk	3.84272	1.81392	0.000151561	0.00372782
88	ed	3.84041	1.60377	0.00015319	0.00375873
89	tai	3.81554	1.94309	0.000169579	0.00407192
90	aos	3.80581	2.6524	0.000186645	0.00439144
91	chb	3.79053	1.8094	0.000185287	0.00437632
92	pum	3.78965	1.27057	0.000186796	0.00439144
93	Tsp42Ee	3.71735	1.50875	0.000244814	0.00545116
94	dlp	3.68718	1.98874	0.000278694	0.00601991
95	Eip55E	3.67951	1.99544	0.000287043	0.00616076
96	betaTub60D	3.67489	2.0405	0.00029282	0.00623183
97	CG44774	3.67218	1.44846	0.000289484	0.00618687
98	Hsp26	3.63693	1.50916	0.000338034	0.00697385
99	CG13029	3.61413	1.93112	0.000363762	0.00731068
100	pAbp	3.59605	0.190214	0.000385694	0.00772076
101	Sptr	3.52746	2.80201	0.000526382	0.00980766
102	CG9752	3.45709	1.99255	0.000645012	0.0116229
103	CG5590	3.3755	1.92233	0.000861365	0.0146345
104	ND-B17	3.36685	1.48438	0.000870261	0.0147361
105	His2B:CG33868	3.35855	1.69452	0.000897926	0.0150533
106	Aldh	3.34591	1.79223	0.000945169	0.0155927
107	Glo1	3.34331	1.39053	0.000945527	0.0155927
108	Hs6st	3.33219	1.6635	0.000983711	0.0160912
109	UQCR-6.4	3.3239	0.65587	0.00102112	0.0164895
110	dj-1beta	3.32204	0.844254	0.00101688	0.0164475
111	timeout	3.31705	2.9288	0.00109212	0.0174965
112	Rpt3R	3.31242	1.8311	0.00106399	0.0171546
113	Rap2l	3.27524	1.50837	0.0011926	0.0189262
114	ND-MLRQ	3.26003	0.846638	0.00125825	0.0196594
115	crp	3.25984	1.3653	0.00125705	0.0196594
116	CG9240	3.25654	1.79793	0.00128647	0.0198963
117	snRNA:U12	3.25432	1.6887	0.00128719	0.0198963
118	FER	3.23796	3.66777	0.00145974	0.0219919
119	CG11590	3.21576	1.79613	0.00147854	0.0222088
120	CG31549	3.18615	2.0674	0.00164652	0.0243699
121	CG2852	3.17728	0.704401	0.00166711	0.0246027
122	SdhC	3.15596	1.30045	0.00178264	0.0258176
123	Trx-2	3.14795	1.15185	0.00183263	0.0263528
124	Trf2	3.14734	1.40229	0.00183157	0.0263528
125	CG15646	3.1199	1.46152	0.00200442	0.0283363
126	Sgt	3.1169	1.48338	0.00202394	0.0283965
127	roh	3.10895	0.657598	0.00208819	0.0288382
128	28SrRNA-Psi:CR45859	3.10636	0.374589	0.00218642	0.0298279
129	MAGE	3.09201	1.84074	0.00222568	0.0302443
130	CG14966	3.08412	1.57247	0.00225802	0.0304757
131	NP15.6	3.08218	1.30882	0.00226686	0.0305542
132	cathD	3.07891	1.50888	0.00229318	0.0306637
133	can	3.07496	4.14161	0.00248276	0.0325242
134	blot	3.0604	1.96763	0.00247584	0.0325043
135	RFeSP	3.01657	0.870691	0.00280015	0.0357803
136	CR42875	3.0116	2.45945	0.00293672	0.0369705
137	agt	3.00912	1.69	0.0028882	0.0365875
138	Zyx	3.00736	1.45802	0.00288304	0.0365787
139	ft	2.99887	3.07523	0.00310753	0.0385246
140	Arpc1	2.9986	1.57201	0.00297807	0.0373515
141	Tom7	2.9959	1.12636	0.00299434	0.0374626
142	CG2021	2.96566	1.37782	0.0032886	0.0401394
143	lft	2.9552	1.61014	0.0034172	0.040978
144	CG42495	2.95451	4.15365	0.00362284	0.0427842
145	28SrRNA-Psi:CR45860	2.93882	0.545766	0.00379309	0.04438
146	awd	2.93816	0.28981	0.00373181	0.0438662
147	Rpi	2.92379	1.45012	0.00375216	0.0440541
148	CG11077	2.91459	1.56425	0.00388172	0.045328
149	CG42674	2.90197	1.55105	0.00402743	0.0465127
150	CG1927	2.87739	1.86966	0.00438477	0.0496416
151	CG7054	2.87454	2.51497	0.00449712	0.0505533
152	RfC38	2.87354	1.41714	0.00438237	0.0496416
153	CG8520	2.86645	1.66869	0.00451386	0.0506444
154	Claspin	2.8603	1.96319	0.00463032	0.0511977
155	Taf12L	2.84165	1.66237	0.00486631	0.0530103
156	RNASEK	2.81896	1.20704	0.00517275	0.0554521
157	CG32267	2.81564	1.28912	0.0052242	0.0558852
158	CG1607	2.80809	2.90773	0.00553946	0.0582396
159	sdk	2.80066	1.43699	0.00547454	0.0578287
160	Prosalpha3	2.79337	0.644682	0.00563282	0.0590686
161	18SrRNA-Psi:CR41602	2.78598	0.604267	0.00603289	0.0620412
162	RPA3	2.76301	1.36405	0.00611956	0.0625507
163	Eglp4	2.76098	1.91718	0.0062409	0.0632157
164	CG13551	2.75166	0.50606	0.0063528	0.0640284
165	CG2493	2.74697	1.45045	0.00643939	0.0646399
166	ND-13B	2.7305	1.17495	0.00673831	0.0667166
167	colt	2.70836	1.47685	0.00721835	0.0701637
168	Pih1D1	2.67841	1.35047	0.00785787	0.0752941
169	CG2767	2.67702	1.39623	0.00789709	0.0755688
170	Lam	2.67212	0.725288	0.00800922	0.0763798
171	CG14441	2.67156	2.06851	0.00813872	0.0771081
172	Nedd8	2.66743	0.521056	0.00810545	0.0769371
173	28SrRNA-Psi:CR45855	2.65171	0.541072	0.00879481	0.0815874
174	shot	2.65084	1.30103	0.00850179	0.0798
175	CG12171	2.63853	1.48807	0.0088444	0.0818755
176	Sod2	2.63513	1.19238	0.00889437	0.0822627
177	Pfk	2.62685	1.6544	0.00917839	0.0840843
178	COX7A	2.6119	0.450029	0.00950636	0.0864207
179	CG45263	2.60522	2.52208	0.00991521	0.0894138
180	NK7.1	2.5944	1.55618	0.0100411	0.0901471
181	Men	2.59137	1.26048	0.0100786	0.0903229
182	dan	2.59132	1.86192	0.0101903	0.0910012
183	mbl	2.58502	0.439285	0.0102793	0.0915536
184	CG2611	2.57871	1.7077	0.0105316	0.0931446
185	SNF4Agamma	2.56553	1.28825	0.0108454	0.0951706
186	DNApol-alpha60	2.56376	1.73757	0.010988	0.0958732
187	CG13305	2.55989	0.841984	0.011022	0.0959706
188	lola	2.55845	0.271433	0.0110566	0.096189
189	CG3420	2.55473	1.55286	0.0112395	0.0973605
190	Chrac-14	2.55181	1.12555	0.0112645	0.0974941
191	nmo	2.54964	1.06062	0.0113395	0.0976492
192	mRpL34	2.53842	1.21352	0.011696	0.0996921
193	Spred	2.53552	1.26976	0.0117966	0.100296
194	CycE	2.53365	1.00475	0.0118592	0.10049
195	CG4627	2.52243	3.11498	0.0125817	0.104768
196	sesB	2.52194	0.39335	0.0122461	0.102906
197	CG30022	2.52057	1.67944	0.0123772	0.103577
198	CG3085	2.52049	2.13115	0.0124789	0.103997
199	CG9804	2.51865	1.65916	0.012452	0.103859
200	CG8132	2.49623	1.72007	0.0132598	0.109067
201	salt	2.49486	27.8861	0.0137977	0.112304
202	CG31710	2.4945	27.8464	0.0138111	0.112322
203	wb	2.49217	27.8493	0.013898	0.112766
204	snoRNA:Psi28S-2996	2.49214	27.873	0.0138992	0.112766
205	Gp150	2.48943	2.00901	0.0135646	0.111122
206	so	2.48567	1.80222	0.0136659	0.11154
207	CG14937	2.48113	1.57674	0.0137847	0.112288
208	foxo	2.46068	1.50988	0.0145596	0.116997
209	ox	2.4571	0.766752	0.0146418	0.117285
210	RabX6	2.45637	2.65252	0.0149762	0.119396
211	Shmt	2.45602	1.49815	0.0147381	0.117963
212	pxb	2.44659	1.96869	0.0152252	0.120809
213	trn	2.43814	1.27625	0.0154038	0.121852
214	smog	2.43298	1.13257	0.0156199	0.123143
215	MYPT-75D	2.43086	1.57605	0.0157859	0.123705
216	CG33298	2.43069	1.29481	0.0157458	0.123679
217	ND-B12	2.42582	0.926652	0.0159315	0.124653
218	Mpcp2	2.40545	1.03737	0.0168207	0.129727
219	Treh	2.40501	1.354	0.0168895	0.129871
220	cer	2.40452	1.92727	0.01703	0.130306
221	eca	2.40227	1.02973	0.0169646	0.130017
222	TfIIA-S	2.38335	0.584547	0.0178448	0.134722
223	cno	2.38303	1.20239	0.0178697	0.134772
224	bun	2.36626	1.15645	0.0186741	0.13901
225	Toll-7	2.35946	1.24263	0.0190218	0.141079
226	CG9471	2.35824	1.23463	0.019093	0.141504
227	msi	2.35726	0.829287	0.019129	0.141667
228	Naa40	2.35292	1.13215	0.0193415	0.142822
229	Spn55B	2.34866	1.92261	0.0197601	0.145088
230	RhoGAP93B	2.33894	1.25066	0.0200958	0.146996
231	Cyt-c-p	2.33567	0.508067	0.0202608	0.148056
232	kat-60L1	2.33317	3.53446	0.0208673	0.151372
233	Mcm3	2.32145	1.1679	0.0210109	0.151931
234	dnk	2.31599	1.21812	0.0213355	0.153549
235	Su(Tpl)	2.31156	1.13682	0.0215532	0.154307
236	CG34125	2.29725	1.21409	0.0223878	0.157933
237	ssp3	2.28312	1.1747	0.0232142	0.162291
238	28SrRNA-Psi:CR40741	2.28185	0.42733	0.0238449	0.165669
239	Btk29A	2.28099	1.71984	0.0234859	0.16385
240	LBR	2.27936	1.16312	0.0234377	0.163627
241	bonsai	2.27756	1.10775	0.0235353	0.163969
242	elB	2.27353	2.83664	0.0241978	0.167545
243	CG32163	2.27242	1.65557	0.0239919	0.166347
244	snoRNA:Psi18S-531	2.26806	27.5374	0.0249014	0.171244
245	EbpIII	2.26635	27.6112	0.0250085	0.171752
246	d	2.266	27.5699	0.0250306	0.171752
247	fws	2.26562	2.03948	0.0244945	0.169021
248	CG34229	2.26537	1.65912	0.0244242	0.168651
249	pain	2.26525	27.7135	0.0250777	0.171752
250	vas	2.26288	2.82043	0.0248588	0.171184
251	eg	2.25622	1.83062	0.0250434	0.171752
252	corn	2.25385	1.12945	0.0250201	0.171752
253	sba	2.24682	1.30183	0.0255178	0.173243
254	CG11752	2.24491	1.05086	0.0255779	0.173535
255	CG12288	2.23609	1.35209	0.0262252	0.176517
256	CG17734	2.2251	0.848211	0.0268985	0.179719
257	Neb-cGP	2.2214	0.623723	0.0271477	0.180447
258	hpRNA:CR32207	2.21728	1.08908	0.0274373	0.181759
259	Pcmt	2.20938	1.10712	0.0279985	0.184389
260	GstS1	2.20846	1.53383	0.0281656	0.185128
261	COX5B	2.19967	0.574323	0.0286718	0.18748
262	DNApol-alpha50	2.19379	2.38737	0.0294548	0.190993
263	CG14483	2.19245	1.14176	0.0292209	0.190086
264	miple1	2.18686	1.0778	0.0296096	0.19173
265	CG17493	2.18373	0.907529	0.0298386	0.19274
266	DAT	2.17065	1.80494	0.0310522	0.198549
267	Idh3b	2.15314	1.05348	0.0321916	0.204028
268	CG3618	2.14794	1.86518	0.03285	0.207162
269	FASN3	2.14606	3.48743	0.0333827	0.208487
270	CG41128	2.14144	0.75383	0.0331273	0.207873
271	Msp300	2.14104	1.14697	0.0331846	0.208104
272	CG42376	2.14043	1.38214	0.0333085	0.208487
273	Ufd4	2.12537	1.13218	0.0344912	0.213778
274	levy	2.12391	0.545526	0.0345996	0.214187
275	galla-1	2.12343	1.31797	0.0347013	0.214423
276	CG34242	2.12311	1.84528	0.034891	0.2152
277	CG14715	2.12206	0.910697	0.0347368	0.214448
278	Lmpt	2.11808	3.34804	0.0356767	0.217823
279	CG11699	2.11704	0.952992	0.0351653	0.216101
280	CG17272	2.11563	1.08564	0.0353049	0.216432
281	28SrRNA-Psi:CR41609	2.11532	0.369251	0.0359097	0.218945
282	ERp60	2.10403	0.81443	0.0362995	0.220058
283	Pex7	2.09989	0.577184	0.0366598	0.22125
284	ZnT41F	2.08805	3.26545	0.0383108	0.226488
285	GABPI	2.08433	1.26437	0.038145	0.225898
286	CG32817	2.08412	2.6968	0.0385861	0.227444
287	snRNA:U4:39B	2.08393	1.81211	0.0383343	0.226488
288	CG9662	2.07787	1.01482	0.038662	0.227628
289	cher	2.07224	3.2257	0.0397612	0.231803
290	LManII	2.06676	3.19535	0.0402734	0.232936
291	CtsB1	2.05887	0.976655	0.040459	0.233314
292	Pex19	2.05435	1.19155	0.0409661	0.235242
293	CG5126	2.05218	1.22742	0.04118	0.236033
294	Arf51F	2.04687	1.01066	0.0416362	0.237666
295	CG31038	2.0444	2.61103	0.0423602	0.240708
296	CG7824	2.03756	1.68192	0.0427631	0.242342
297	Gip	2.03279	1.24783	0.0431291	0.243571
298	sdt	2.02914	2.58809	0.0438949	0.247144
299	pyx	2.02205	27.1998	0.0451329	0.251805
300	Kul	2.02179	27.1868	0.04516	0.251805
301	CG31612	2.02104	27.1667	0.0452379	0.251921
302	IM14	2.0205	27.2146	0.0452946	0.251933
303	robl	2.01809	0.977714	0.0445634	0.249857
304	Glut1	2.01156	27.1612	0.0462422	0.25496
305	ATPsynF	2.01153	0.390491	0.0452555	0.251921
306	CG31997	2.01067	1.43522	0.0454795	0.25275
307	ND-19	2.00721	0.943596	0.0457185	0.253104
308	dUTPase	2.00519	0.476993	0.045994	0.254073
309	CG17224	2.00022	2.52901	0.0469279	0.257097
310	CG13108	1.99547	1.06098	0.0470247	0.257097
311	Atox1	1.99455	1.14579	0.0471557	0.257535
312	VhaM9.7-a	1.99105	2.51554	0.0479304	0.260641
313	luna	1.98705	2.22254	0.0483148	0.261654
314	ASPP	1.9838	2.49043	0.0487301	0.262711
315	Hsc70-4	1.9747	0.153585	0.0493154	0.264322
316	Cys	1.9672	2.00677	0.0505191	0.268255
317	CG4078	1.96481	2.18756	0.0508414	0.269369
318	Snoo	1.96247	1.03817	0.050755	0.269052
319	Dcp-1	1.95932	1.35683	0.0512057	0.270448
320	CG32039	1.95555	1.02329	0.0515678	0.271935
321	GstE13	1.95418	2.17331	0.0520842	0.273516
322	CG8507	1.95258	1.03836	0.0519298	0.272989
323	Ctl1	1.94919	1.45015	0.0524711	0.275175
324	app	1.9472	1.02772	0.0525676	0.275197
325	sif	1.94224	2.42419	0.0535618	0.279101
326	CG30089	1.94071	2.14682	0.0536977	0.279377
327	mRpS14	1.93027	0.947005	0.0546169	0.282856
328	CG42813	1.91391	0.973977	0.0566938	0.289746
329	UQCR-14	1.90471	0.688432	0.0578851	0.29405
330	His2B:CG17949	1.90342	1.53137	0.0582422	0.294975
331	CG30373	1.90327	1.07763	0.0581157	0.294701
332	snRNA:U6atac	1.89803	1.52053	0.0589458	0.297793
333	alphaTub84B	1.88795	0.135452	0.0601169	0.301765
334	emp	1.8748	3.09561	0.0625619	0.308506
335	uex	1.87304	0.856861	0.0621359	0.307305
336	PEK	1.87019	1.38863	0.062683	0.308953
337	l(1)G0289	1.86967	1.87908	0.0628944	0.309568
338	CG8195	1.8696	3.08382	0.0632791	0.310679
339	Mgstl	1.86476	1.64228	0.0635219	0.311417
340	CG9953	1.85845	0.998066	0.064215	0.314233
341	Cisd2	1.85821	0.738592	0.0642205	0.314233
342	eIF4EHP	1.85717	0.91425	0.0643743	0.314594
343	CG32944	1.85603	3.05079	0.065184	0.317647
344	CG3663	1.85601	1.55043	0.0647356	0.315836
345	Cpr66D	1.85474	1.55208	0.0649178	0.316572
346	CG9684	1.85	1.32914	0.0655304	0.318331
347	CG7630	1.84826	0.335393	0.0656721	0.318689
348	CG30109	1.84359	0.956079	0.0663553	0.321412
349	eya	1.8431	0.9379	0.06642	0.321417
350	Prx6005	1.84231	0.811546	0.0665185	0.321528
351	Tim9a	1.84123	0.864291	0.0666776	0.32174
352	CG17059	1.83857	0.899961	0.0670821	0.323537
353	Cka	1.83458	0.938621	0.0676732	0.325766
354	snRNA:U4:38AB	1.83341	1.52254	0.0680279	0.326696
355	Tret1-1	1.82117	2.93891	0.0702918	0.334582
356	Galt	1.82019	1.5141	0.0700203	0.333885
357	Pgd	1.8174	2.93673	0.0708692	0.336188
358	eEF5	1.81498	0.116034	0.0706305	0.335528
359	CG12496	1.8112	0.97895	0.0712466	0.337374
360	Rcc1	1.80941	0.813007	0.0714914	0.33762
361	Manf	1.79643	0.775934	0.0735357	0.344632
362	Sra-1	1.79609	1.00274	0.0736413	0.344967
363	Pfdn5	1.7942	0.792403	0.0738925	0.345984
364	path	1.79386	0.928398	0.073959	0.346135
365	VhaAC45	1.79275	1.27218	0.0742646	0.346923
366	sn	1.77056	2.3134	0.07823	0.359467
367	CG7834	1.76249	0.827326	0.0791109	0.362942
368	ana2	1.76237	1.83469	0.0794742	0.363861
369	tsr	1.76219	0.175257	0.0796977	0.364554
370	CG5676	1.75808	0.440643	0.0798753	0.364682
371	CG8206	1.75416	0.98231	0.0805762	0.366582
372	Ncc69	1.75179	0.881538	0.0809497	0.367289
373	CG14341	1.74842	1.36854	0.0817005	0.36937
374	Bem46	1.74491	26.7399	0.0832594	0.370713
375	fuss	1.74485	26.7015	0.0832703	0.370713
376	Lrp4	1.74485	26.7415	0.0832704	0.370713
377	CG32801	1.74449	26.7731	0.0833327	0.370713
378	CG5758	1.74442	26.7723	0.0833448	0.370713
379	CG1271	1.74439	26.7468	0.08335	0.370713
380	janB	1.74437	26.7146	0.0833545	0.370713
381	GluRIIB	1.74424	26.8109	0.0833767	0.370713
382	Esyt2	1.74416	26.7756	0.0833909	0.370713
383	alpha-Est3	1.74414	26.7546	0.0833936	0.370713
384	Cyp4d2	1.74395	26.7408	0.0834278	0.370713
385	CR43361	1.74343	26.7339	0.0835193	0.370793
386	CG10654	1.74292	26.8394	0.0836085	0.370886
387	DJ-1alpha	1.74289	26.7512	0.0836135	0.370886
388	ATPsynE	1.74265	0.340466	0.0825613	0.370713
389	CG12075	1.74213	26.7951	0.0837469	0.371095
390	mei-W68	1.74199	26.7467	0.0837707	0.371095
391	GLS	1.74128	26.8866	0.0838962	0.371488
392	knk	1.73816	26.6972	0.0844462	0.372617
393	bol	1.73532	26.8219	0.0849497	0.374035
394	Gabat	1.73528	26.8822	0.0849569	0.374035
395	CG6236	1.73457	1.11887	0.084051	0.371847
396	ImpE1	1.73456	26.7507	0.0850837	0.374287
397	Dlc90F	1.72918	0.785558	0.0849123	0.374035
398	CG12206	1.72783	26.8669	0.0862889	0.377893
399	Dak1	1.72738	0.842217	0.0852412	0.374817
400	CG12947	1.72603	1.97389	0.0858534	0.377016
401	Syx1A	1.72338	0.786326	0.0859576	0.377182
402	Vha16-1	1.72023	0.753045	0.0865393	0.378616
403	Ppt1	1.71985	1.40076	0.0867912	0.379486
404	CG11158	1.71949	1.95573	0.0870331	0.380051
405	Vha26	1.71839	0.901501	0.0869108	0.379681
406	CG16986	1.71633	1.65347	0.0875196	0.381439
407	dpr12	1.71465	1.948	0.0879163	0.38275
408	Chd64	1.71107	1.45315	0.088421	0.38412
409	CG30094	1.71105	0.991955	0.0882752	0.383754
410	CG15922	1.69941	0.998123	0.0904448	0.389564
411	CG7638	1.69891	1.23455	0.0906107	0.389769
412	CG11109	1.69878	1.07456	0.0905862	0.389769
413	spidey	1.69268	0.925127	0.0917001	0.392825
414	Rdh	1.69252	0.861248	0.0917071	0.392825
415	CG8950	1.68897	3.09281	0.093168	0.395079
416	chinmo	1.68555	0.496502	0.093033	0.395079
417	CG5346	1.68109	0.828402	0.0938946	0.395079
418	RpS5a	1.67832	0.123309	0.094453	0.395373
419	skd	1.67787	0.766144	0.0945228	0.395483
420	CG12384	1.67521	0.806585	0.0950444	0.396699
421	ND-ASHI	1.66214	0.795221	0.097638	0.404849
422	CG5355	1.65819	0.826693	0.0984432	0.406687
423	mgl	1.65688	1.87085	0.099022	0.408077
424	CG13690	1.65612	0.946114	0.0989019	0.407915
425	CG14903	1.65131	0.944716	0.0998804	0.410277
426	mRpL19	1.6429	0.814552	0.101567	0.414334
427	koi	1.64142	0.832278	0.101879	0.415114
428	CTCF	1.63877	0.960674	0.102469	0.416728
429	CG17385	1.63872	0.767294	0.102427	0.416728
430	Cad87A	1.62753	0.917516	0.10482	0.423514
431	CG7506	1.62628	1.08369	0.105143	0.424477
432	Sdc	1.61732	0.806334	0.10698	0.430011
433	Sulf1	1.61217	1.53148	0.108307	0.432624
434	CG1902	1.6118	1.16376	0.108272	0.432624
435	Tom20	1.60829	0.652666	0.108932	0.434054
436	mRpL46	1.60714	0.909484	0.109227	0.434941
437	CG4570	1.60391	0.725656	0.109895	0.436856
438	tweek	1.59979	0.885684	0.11085	0.43979
439	RnrL	1.59767	0.810058	0.111295	0.440862
440	beta4GalT7	1.59659	1.08326	0.111638	0.441529
441	CG6695	1.59416	0.919172	0.112105	0.442084
442	ND-ACP	1.59364	0.459179	0.112195	0.442092
443	Cip4	1.59332	0.795326	0.112261	0.442092
444	mRpS9	1.59214	0.829031	0.112534	0.442649
445	Mcm7	1.59052	0.867921	0.112914	0.443627
446	CG15651	1.59042	2.75066	0.113549	0.445081
447	klu	1.58365	0.842342	0.114454	0.447509
448	cni	1.58353	0.788092	0.114474	0.447509
449	Mpc1	1.57998	2.7282	0.11591	0.451885
450	Pde11	1.5735	1.13052	0.116886	0.454747
451	CG9175	1.5684	2.68543	0.118565	0.460458
452	RpS10a	1.56719	2.68396	0.118844	0.460897
453	ND-15	1.56355	0.675576	0.119086	0.46142
454	insb	1.56116	0.744831	0.119653	0.463436
455	CG42613	1.55859	2.65843	0.120855	0.46749
456	CG4210	1.55647	2.65257	0.121355	0.468951
457	Karybeta3	1.5468	0.759318	0.12308	0.473807
458	4E-T	1.5444	0.768454	0.123664	0.475692
459	tinc	1.53972	2.11607	0.12526	0.480006
460	TfIIA-L	1.53492	0.753024	0.125971	0.481999
461	CG17672	1.53202	2.58524	0.127239	0.485196
462	CG6962	1.53141	1.01603	0.126906	0.484478
463	l(1)G0320	1.53011	0.734009	0.127152	0.485157
464	orb2	1.5298	2.58669	0.127788	0.486674
465	porin	1.52873	0.268021	0.127516	0.485887
466	ND-MNLL	1.52734	2.57385	0.12839	0.48688
467	hpRNA:CR32205	1.5265	1.40577	0.128274	0.48688
468	UQCR-11	1.52616	0.408047	0.128202	0.48688
469	CG6330	1.5252	0.891462	0.128417	0.48688
470	CG9650	1.52518	0.968567	0.128451	0.48688
471	CG13220	1.5203	0.762867	0.129604	0.490332
472	Surf1	1.52007	1.0001	0.129743	0.490516
473	Jafrac1	1.51606	0.290598	0.130665	0.493056
474	VhaM9.7-c	1.51571	0.870074	0.1308	0.493381
475	Sap47	1.50938	0.804975	0.132388	0.498069
476	cype	1.50896	0.299526	0.132511	0.498345
477	mRpL9	1.50671	0.78666	0.133066	0.499877
478	CG5510	1.50615	0.74447	0.133197	0.499996
479	S2P	1.50528	2.04209	0.13384	0.501773
480	cpo	1.50442	2.06746	0.134074	0.502169
481	Dhpr	1.50086	0.711503	0.134558	0.50347
482	Vps26	1.50069	0.799473	0.13462	0.50347
483	Vta1	1.49786	0.839106	0.13536	0.505534
484	CG33129	1.49313	0.419007	0.136568	0.508684
485	Uch	1.49255	0.692949	0.136715	0.508854
486	Adf1	1.48525	0.727985	0.138641	0.514319
487	Trpm	1.48471	1.74897	0.139116	0.515269
488	CG8204	1.48258	0.975317	0.139424	0.515763
489	CG10336	1.48224	0.74299	0.139438	0.515763
490	CG44242	1.47744	0.564741	0.140718	0.51879
491	Amun	1.47514	0.582443	0.141332	0.520176
492	snoRNA:Psi28S-2626	1.47471	1.99255	0.141839	0.52121
493	Dtg	1.47048	0.934605	0.14266	0.523277
494	rst	1.45892	1.42638	0.145965	0.530228
495	Edem2	1.45773	0.941413	0.146137	0.530228
496	CG31344	1.45401	1.25749	0.147261	0.530228
497	Cep135	1.45343	0.822313	0.147297	0.530228
498	crq	1.45335	1.54871	0.14755	0.530228
499	CG17721	1.45213	1.25049	0.147781	0.53051
500	Sps2	1.44701	1.1018	0.14915	0.532399
501	CG10470	1.4456	0.663322	0.149441	0.533063
502	CG43367	1.44285	1.68866	0.150511	0.535744
503	CG13751	1.4411	0.653134	0.150708	0.535881
504	CG12219	1.43533	1.30958	0.152521	0.540615
505	Dlish	1.43297	0.870809	0.153061	0.54139
506	Hsc20	1.43031	1.67044	0.154062	0.543018
507	RhoBTB	1.43022	1.30386	0.153977	0.543018
508	hig	1.42964	1.23401	0.154114	0.543018
509	CG5910	1.42652	0.812205	0.154896	0.543018
510	mRpS16	1.42524	0.663999	0.155236	0.543018
511	CG40472	1.42375	1.90175	0.156002	0.543018
512	Papst2	1.42279	0.916768	0.156002	0.543018
513	seq	1.41986	1.65708	0.157073	0.543018
514	dysc	1.41944	26.1441	0.15806	0.543018
515	CG31139	1.41944	26.176	0.15806	0.543018
516	CR44906	1.41943	26.1036	0.15806	0.543018
517	CG12344	1.41943	26.0938	0.158061	0.543018
518	CR14578	1.41943	26.1604	0.158061	0.543018
519	CG6752	1.41943	26.07	0.158061	0.543018
520	CG5835	1.41943	26.182	0.158062	0.543018
521	Asph	1.41943	26.179	0.158063	0.543018
522	snoRNA:Psi28S-1135a	1.41942	26.1388	0.158063	0.543018
523	CG44405	1.41942	26.1876	0.158064	0.543018
524	Cubn	1.41941	26.1428	0.158067	0.543018
525	CG46304	1.41941	26.1996	0.158067	0.543018
526	CR43309	1.41941	26.155	0.158067	0.543018
527	CG17698	1.4194	26.1788	0.15807	0.543018
528	Hsp67Bc	1.4194	26.088	0.15807	0.543018
529	ovo	1.41939	26.2007	0.158073	0.543018
530	CNT1	1.41939	26.1203	0.158074	0.543018
531	Trf4-2	1.41939	26.2072	0.158074	0.543018
532	CG3301	1.41939	26.2006	0.158074	0.543018
533	Got2	1.41939	26.2915	0.158075	0.543018
534	CG15544	1.41935	26.1276	0.158084	0.543018
535	CG10026	1.41935	26.1816	0.158085	0.543018
536	CG5079	1.41931	26.0642	0.158098	0.543018
537	CG7860	1.41929	26.1433	0.158102	0.543018
538	CG13055	1.41929	26.0867	0.158104	0.543018
539	CG6026	1.41928	26.1946	0.158106	0.543018
540	Syt4	1.41925	26.109	0.158114	0.543018
541	Rh4	1.4192	26.202	0.158129	0.543018
542	GstD10	1.41918	26.0711	0.158134	0.543018
543	CG6220	1.41917	26.1361	0.158137	0.543018
544	Cdk5alpha	1.41916	26.1185	0.158141	0.543018
545	tomb	1.41915	26.1058	0.158143	0.543018
546	jbug	1.41913	26.1691	0.158148	0.543018
547	CG5071	1.41912	26.1764	0.158153	0.543018
548	CG17258	1.4191	26.1661	0.158158	0.543018
549	CG16888	1.41898	26.1757	0.158192	0.543018
550	danr	1.41893	1.12057	0.157177	0.543018
551	CG11842	1.41883	26.0638	0.158238	0.543018
552	CG42327	1.41881	26.1794	0.158243	0.543018
553	CG11700	1.41876	26.1427	0.158257	0.543018
554	CG14785	1.41869	26.1475	0.158278	0.543018
555	exp	1.41869	26.1082	0.158278	0.543018
556	snoRNA:SC35-a	1.41865	26.1588	0.158287	0.543018
557	CG4301	1.41864	26.1575	0.15829	0.543018
558	CG31195	1.41863	26.1683	0.158296	0.543018
559	CG32816	1.41861	26.1583	0.1583	0.543018
560	CG3323	1.4186	26.2278	0.158302	0.543018
561	CG31231	1.41843	26.1681	0.158353	0.543018
562	snoRNA:Or-aca3	1.41835	26.0785	0.158376	0.543018
563	CG31475	1.41833	26.1617	0.158383	0.543018
564	PCNA2	1.41822	26.1074	0.158415	0.543018
565	St4	1.41808	26.1563	0.158456	0.543018
566	ppk23	1.418	26.1514	0.158479	0.543018
567	CG5973	1.41794	26.242	0.158496	0.543018
568	CG15083	1.41793	26.1048	0.1585	0.543018
569	CG12290	1.4178	26.2246	0.158535	0.543018
570	Etf-QO	1.41776	26.1175	0.158547	0.543018
571	CG14868	1.41776	26.2073	0.158548	0.543018
572	ana1	1.41762	0.808079	0.157477	0.543018
573	Dic61B	1.41761	26.1527	0.15859	0.543018
574	CG1909	1.41756	26.1744	0.158605	0.543018
575	tbrd-1	1.41752	26.4903	0.158617	0.543018
576	CG16758	1.41723	26.277	0.158702	0.543018
577	AsnS	1.41719	26.1924	0.158713	0.543018
578	p38c	1.41703	26.0602	0.15876	0.543018
579	CG32320	1.41683	26.064	0.158819	0.543018
580	BBS8	1.41682	26.1355	0.158822	0.543018
581	CG42392	1.41647	26.2644	0.158925	0.543018
582	CG43324	1.41641	26.0715	0.158943	0.543018
583	CG3829	1.41605	26.2025	0.159046	0.543018
584	CG7800	1.41596	26.2037	0.159074	0.543018
585	CG33155	1.41585	26.1541	0.159105	0.543018
586	Syt7	1.41548	26.237	0.159215	0.543018
587	CG1674	1.41524	26.1634	0.159284	0.543018
588	CG17834	1.41517	26.0234	0.159304	0.543018
589	CG17294	1.41402	1.21708	0.158642	0.543018
590	Tsp42Ef	1.41364	26.1755	0.159752	0.543774
591	CG18528	1.41362	26.0446	0.15976	0.543774
592	CG9281	1.41126	0.681909	0.159313	0.543018
593	CG31937	1.40787	1.27973	0.16048	0.545307
594	fs(1)K10	1.40627	1.20642	0.160927	0.546458
595	ago	1.40453	1.01885	0.161408	0.547174
596	CG32280	1.4015	1.2142	0.162342	0.548959
597	COX7C	1.40095	0.334377	0.162369	0.548959
598	dally	1.40016	1.27652	0.162769	0.549943
599	Nmdmc	1.40003	1.14465	0.162763	0.549943
600	ND-B15	1.38439	0.595554	0.167373	0.560627
601	Catsup	1.37874	0.746085	0.16913	0.565363
602	pall	1.37826	0.798383	0.169289	0.565363
603	yip2	1.37288	1.24463	0.171068	0.569607
604	ND-B14.7	1.36994	0.665108	0.17184	0.570852
605	CG32278	1.36984	0.720764	0.171885	0.570852
606	whd	1.36804	1.5874	0.172662	0.57272
607	Cap-H2	1.3576	1.01544	0.175819	0.579886
608	CG5112	1.35527	0.753167	0.176481	0.58169
609	polybromo	1.35041	0.697276	0.178019	0.584175
610	bdg	1.3498	0.809848	0.178246	0.584461
611	CG15908	1.34575	1.08454	0.179635	0.588062
612	CG15744	1.3399	0.855197	0.181453	0.593051
613	chas	1.33904	2.5331	0.18231	0.59465
614	kst	1.33734	0.812431	0.182289	0.59465
615	CG42239	1.33634	0.647818	0.182559	0.595127
616	CG42542	1.33509	0.995997	0.183059	0.59612
617	enok	1.33416	0.719588	0.183284	0.596393
618	ApepP	1.33106	0.785128	0.184328	0.598384
619	ND-B18	1.32256	0.618263	0.187092	0.605959
620	mt:srRNA	1.31893	0.185256	0.188476	0.608723
621	SamDC	1.31587	1.05678	0.189444	0.611655
622	dco	1.31496	0.651049	0.189638	0.612085
623	pnut	1.31463	0.654209	0.189744	0.612171
624	Imp	1.31125	0.829444	0.190944	0.614534
625	tgo	1.31046	0.825636	0.191191	0.615134
626	Jheh2	1.30981	0.684777	0.191379	0.615345
627	grim	1.29929	0.823335	0.194988	0.62359
628	Myo31DF	1.29552	0.827799	0.196288	0.626746
629	CG1572	1.29035	2.39487	0.198573	0.631249
630	CG7523	1.29028	0.655534	0.198056	0.630202
631	CG11267	1.28808	0.494924	0.198813	0.631616
632	ATPsynbeta	1.28723	0.224218	0.199121	0.632396
633	CG16957	1.28239	2.36848	0.201331	0.638212
634	CG5214	1.28199	0.605136	0.200939	0.637167
635	sfl	1.27477	0.717994	0.203513	0.642961
636	CG10041	1.27455	2.35161	0.204077	0.644042
637	CG8066	1.27332	2.34328	0.204507	0.644438
638	CG10340	1.27127	0.66632	0.204738	0.644764
639	Mcm5	1.26847	0.70862	0.205741	0.647117
640	CG8229	1.26706	0.865212	0.206281	0.64808
641	dpa	1.26301	0.660862	0.207682	0.651197
642	Exo84	1.26243	0.759799	0.20792	0.651506
643	parvin	1.26239	0.973142	0.207974	0.651506
644	CG44040	1.2607	2.32015	0.209003	0.653516
645	CG10268	1.2599	0.97245	0.208869	0.653499
646	CG30016	1.25868	2.30492	0.209717	0.65433
647	Gs1l	1.25545	0.629269	0.2104	0.655449
648	CG9849	1.25273	0.639009	0.211392	0.65793
649	BubR1	1.25113	0.749693	0.212001	0.65942
650	Fs(2)Ket	1.24991	0.461567	0.212418	0.660157
651	mira	1.24989	0.224902	0.212434	0.660157
652	GNBP3	1.24811	2.27982	0.213539	0.662371
653	Npc2a	1.24471	2.26662	0.214777	0.6648
654	hppy	1.24441	0.780039	0.214462	0.664418
655	CG42238	1.24335	0.665345	0.214832	0.6648
656	UGP	1.24295	0.996641	0.215052	0.664861
657	mRpL13	1.24224	0.599382	0.215221	0.664936
658	G6P	1.24198	1.16323	0.215463	0.66548
659	Cpr	1.23817	1.15787	0.216867	0.667617
660	CG9171	1.2375	0.990413	0.217059	0.667757
661	na	1.2363	1.7672	0.217758	0.668773
662	Galphai	1.23453	0.287236	0.21808	0.669471
663	wdn	1.23205	0.684493	0.219018	0.671944
664	Lsp1gamma	1.22666	1.50056	0.221268	0.677079
665	Gcn2	1.22456	1.14181	0.221939	0.678833
666	Or67d	1.22417	2.22198	0.222387	0.679391
667	CG12213	1.22229	0.79123	0.222708	0.679756
668	cutlet	1.22076	1.1377	0.223374	0.681379
669	aub	1.21886	2.19727	0.224383	0.683229
670	para	1.2185	1.49649	0.224344	0.683229
671	ICA69	1.21849	0.770825	0.224138	0.683091
672	snoRNA:2R:9445205	1.21759	2.19374	0.224855	0.684245
673	mRRF1	1.21501	1.01486	0.225514	0.685386
674	CG31898	1.21459	1.13024	0.225712	0.685386
675	Ino80	1.21299	0.682353	0.226214	0.686313
676	CG3106	1.21054	2.17652	0.227534	0.688872
677	mei-41	1.2087	1.32024	0.228022	0.689524
678	CG32856	1.2087	0.62739	0.22784	0.689386
679	CG32354	1.20807	2.1686	0.228477	0.690295
680	CG34408	1.20751	1.31881	0.228482	0.690295
681	Tsc1	1.20518	1.21033	0.229336	0.69156
682	CG1275	1.20444	2.1606	0.229867	0.69156
683	Sem1	1.20352	0.426672	0.229823	0.69156
684	CG6321	1.20014	1.70465	0.231431	0.69156
685	CG5446	1.19884	0.557214	0.231635	0.69156
686	muc	1.19817	0.661358	0.231916	0.69156
687	ics	1.19734	1.19614	0.232368	0.69156
688	CG10137	1.19166	2.13179	0.234814	0.69156
689	CG7841	1.18968	1.45256	0.235436	0.69156
690	rpk	1.18919	2.12452	0.235779	0.69156
691	CG4896	1.18912	0.883937	0.235486	0.69156
692	stg	1.18652	0.60892	0.236459	0.69156
693	tko	1.18493	0.599191	0.237086	0.69156
694	cuff	1.18281	1.67419	0.238198	0.69156
695	CG13692	1.18258	1.6706	0.238288	0.69156
696	Porin2	1.18251	1.6739	0.238317	0.69156
697	RhoGDI	1.18144	0.594358	0.238467	0.69156
698	GstE11	1.18016	2.10491	0.239334	0.692692
699	His1:CG33834	1.17962	1.67056	0.23946	0.692692
700	Gk1	1.17926	0.893605	0.239403	0.692692
701	fray	1.17914	0.927079	0.239469	0.692692
702	Grasp65	1.17814	0.655346	0.239792	0.692985
703	Eps-15	1.17747	0.680321	0.240056	0.693152
704	SP1173	1.17479	0.982494	0.241186	0.695017
705	Eogt	1.17413	1.09167	0.241482	0.695222
706	CG11134	1.17307	1.17253	0.241935	0.695399
707	CG4390	1.17297	0.49105	0.241835	0.69534
708	Cdc42	1.1722	0.475467	0.242146	0.695427
709	mfrn	1.17172	0.769591	0.242383	0.6955
710	CG9601	1.1701	0.72571	0.243028	0.69656
711	Cad96Ca	1.16894	1.65435	0.243722	0.697165
712	dap	1.16577	0.762279	0.244762	0.698756
713	nAChRalpha5	1.1649	1.02356	0.245176	0.699742
714	GluRS-m	1.16466	2.06643	0.24552	0.700526
715	Ntf-2	1.16235	0.284148	0.246121	0.701546
716	mRpL51	1.1616	0.67864	0.246442	0.701725
717	CG12096	1.1614	0.918729	0.246589	0.701725
718	WRNexo	1.15994	0.914722	0.247177	0.702676
719	CG17724	1.15985	0.587097	0.24713	0.702676
720	CG12848	1.15937	0.562036	0.247323	0.702893
721	Hrb27C	1.15645	0.140777	0.248528	0.705126
722	Optix	1.15529	0.646087	0.248987	0.705973
723	Mondo	1.15145	0.685323	0.250584	0.708971
724	CG14434	1.15083	0.433652	0.250813	0.709419
725	Pex1	1.15031	1.61732	0.251274	0.710327
726	pn	1.1477	1.38799	0.252294	0.712751
727	RpS19b	1.14552	1.39243	0.253191	0.714349
728	koko	1.13958	0.602339	0.255474	0.718783
729	amn	1.13789	1.59705	0.256402	0.719992
730	Mulk	1.13509	0.728666	0.257385	0.72215
731	Cht2	1.13351	1.58853	0.258227	0.723702
732	Phf7	1.13077	0.891891	0.259229	0.725656
733	Mdh1	1.12879	0.604076	0.259993	0.726845
734	CG34117	1.12825	0.551814	0.260212	0.727255
735	hpRNA:CR18854	1.12404	0.710912	0.262028	0.730576
736	Smr	1.12261	0.390365	0.262594	0.731688
737	CG6178	1.12088	1.04285	0.263422	0.733792
738	lilli	1.11797	0.552018	0.264571	0.736384
739	mRpS24	1.11476	0.547305	0.26594	0.738973
740	CG16790	1.11327	1.34492	0.266743	0.740951
741	Meltrin	1.11258	0.911782	0.26696	0.740995
742	CG14073	1.10922	1.10436	0.268419	0.743692
743	SdhD	1.1028	0.532355	0.271092	0.748353
744	trr	1.09644	0.66681	0.273881	0.753358
745	RfC4	1.09623	0.51168	0.273948	0.753358
746	yata	1.09004	0.666714	0.276687	0.759032
747	ATPsynD	1.08964	0.245084	0.276836	0.759081
748	ND-SGDH	1.08899	0.418701	0.277123	0.759197
749	Slik	1.0858	0.553958	0.278537	0.761831
750	Inx3	1.08188	0.512073	0.280266	0.764904
751	CHOp24	1.07437	0.384078	0.283612	0.770295
752	CG14036	1.0733	0.631298	0.284108	0.771316
753	CG7692	1.06907	0.750937	0.286037	0.771316
754	Lpin	1.06888	0.834407	0.286134	0.771316
755	CycA	1.06877	0.51719	0.286125	0.771316
756	CG9951	1.0677	0.622984	0.286626	0.771316
757	Ykt6	1.06197	0.624962	0.289214	0.771316
758	CG10874	1.06087	0.66424	0.289718	0.771316
759	JhI-21	1.05955	0.549075	0.2903	0.771316
760	CG8155	1.05909	0.77434	0.290541	0.771316
761	Med	1.05443	0.611731	0.292641	0.771316
762	Sec15	1.05348	0.897309	0.293136	0.771316
763	RecQ4	1.0534	0.740788	0.293141	0.771316
764	CG2811	1.04756	0.59101	0.295788	0.771316
765	CG16935	1.04682	0.716843	0.29615	0.771316
766	how	1.04668	0.540022	0.296185	0.771316
767	mus81	1.04607	0.71584	0.296494	0.771316
768	CG10214	1.04282	0.519746	0.297961	0.771316
769	Idh	1.0377	0.654338	0.300358	0.771316
770	CG34228	1.03599	0.709496	0.301165	0.771316
771	CG4679	1.03347	1.43092	0.302442	0.771316
772	CdGAPr	1.03169	0.57173	0.30315	0.771316
773	Fas2	1.02938	0.878076	0.304287	0.771316
774	CG12099	1.02368	0.541356	0.306906	0.771316
775	Ire1	1.02267	0.683983	0.3074	0.771316
776	CG4901	1.02266	0.918096	0.307465	0.771316
777	fliI	1.01982	0.738832	0.308765	0.771316
778	CG14234	1.01771	0.829592	0.309778	0.771316
779	oaf	1.01585	0.601842	0.310621	0.771316
780	l(1)10Bb	1.01561	0.48036	0.310717	0.771316
781	CG3430	1.01248	0.791875	0.312256	0.771316
782	Unc-76	1.00357	0.616048	0.316504	0.771316
783	CG7049	1.00219	0.637112	0.317178	0.771316
784	obst-B	1	25.1143	0.319086	0.771316
785	CG10864	1	25.1906	0.319086	0.771316
786	bdl	1	25.1143	0.319086	0.771316
787	CG34056	1	25.1477	0.319086	0.771316
788	CG14357	1	25.2739	0.319086	0.771316
789	DIP-theta	1	25.1682	0.319086	0.771316
790	ec	1	25.1906	0.319086	0.771316
791	CG41520	1	25.029	0.319086	0.771316
792	Rgk3	1	25.1115	0.319086	0.771316
793	CG43755	1	25.2739	0.319086	0.771316
794	CG7227	1	25.1143	0.319086	0.771316
795	SLC22A	1	25.1143	0.319086	0.771316
796	Rchy1	1	25.0352	0.319086	0.771316
797	tim	1	25.0819	0.319086	0.771316
798	CG13436	1	25.1115	0.319086	0.771316
799	CG42526	1	25.0881	0.319086	0.771316
800	Fili	1	25.147	0.319086	0.771316
801	CG5376	1	25.0881	0.319086	0.771316
802	CG17684	1	25.1115	0.319086	0.771316
803	CG42266	1	25.1803	0.319086	0.771316
804	CG3902	1	25.1958	0.319086	0.771316
805	Gs1	1	25.1958	0.319086	0.771316
806	KFase	1	25.0352	0.319086	0.771316
807	AGO3	1	25.1646	0.319086	0.771316
808	Hug	1	25.0928	0.319086	0.771316
809	Cyp6a9	1	25.1127	0.319086	0.771316
810	Dr	1	25.1803	0.319086	0.771316
811	CG9164	1	25.0881	0.319086	0.771316
812	CG14609	1	25.1143	0.319086	0.771316
813	unc79	1	25.1058	0.319086	0.771316
814	msopa	1	25.0819	0.319086	0.771316
815	Rab3	1	25.1803	0.319086	0.771316
816	CG32549	1	25.029	0.319086	0.771316
817	CG30338	1	25.0881	0.319086	0.771316
818	trh	1	25.1958	0.319086	0.771316
819	CG6204	1	25.2924	0.319086	0.771316
820	CG8138	1	25.1646	0.319086	0.771316
821	CG30414	1	25.029	0.319086	0.771316
822	ab	1	25.1477	0.319086	0.771316
823	kirre	1	25.0832	0.319086	0.771316
824	CG15923	1	25.2455	0.319086	0.771316
825	CG14298	1	25.1308	0.319086	0.771316
826	CG14961	1	25.1906	0.319086	0.771316
827	Cpr72Ec	1	25.1598	0.319086	0.771316
828	Spn42Dc	1	24.9953	0.319086	0.771316
829	CG34112	1	25.0352	0.319086	0.771316
830	CG8420	1	25.2455	0.319086	0.771316
831	CG6553	1	25.0928	0.319086	0.771316
832	bab1	1	25.0352	0.319086	0.771316
833	CG12811	1	25.1682	0.319086	0.771316
834	Teh4	1	25.0881	0.319086	0.771316
835	kek2	1	25.1127	0.319086	0.771316
836	mil	1	25.0832	0.319086	0.771316
837	Dbx	1	25.1958	0.319086	0.771316
838	dob	1	25.2101	0.319086	0.771316
839	CG5892	1	25.1172	0.319086	0.771316
840	Dh44-R2	1	25.3279	0.319086	0.771316
841	Lcp9	1	25.1807	0.319086	0.771316
842	CG31221	1	25.1811	0.319086	0.771316
843	Cyp9f2	1	25.163	0.319086	0.771316
844	CG17786	1	25.2101	0.319086	0.771316
845	kkv	1	25.1988	0.319086	0.771316
846	CG15695	1	25.0815	0.319086	0.771316
847	Sytbeta	1	25.0193	0.319086	0.771316
848	CG14262	1	25.1858	0.319086	0.771316
849	fd59A	1	25.1793	0.319086	0.771316
850	nw	1	24.9956	0.319086	0.771316
851	CG8407	1	25.1073	0.319086	0.771316
852	CG10064	1	25.1392	0.319086	0.771316
853	CG10804	1	25.0764	0.319086	0.771316
854	CG13229	1	25.1314	0.319086	0.771316
855	CG3191	1	25.3792	0.319086	0.771316
856	fus	1	25.1713	0.319086	0.771316
857	CG8219	1	25.2283	0.319086	0.771316
858	pre-mod(mdg4)-B	1	25.073	0.319086	0.771316
859	CG32444	1	25.0647	0.319086	0.771316
860	btl	1	25.074	0.319086	0.771316
861	CG6126	1	25.1617	0.319086	0.771316
862	CG9368	1	25.0829	0.319086	0.771316
863	CG42486	1	25.1858	0.319086	0.771316
864	Ets65A	1	25.0778	0.319086	0.771316
865	CG34165	1	25.1643	0.319086	0.771316
866	CG14756	1	25.1454	0.319086	0.771316
867	CG6470	1	25.1217	0.319086	0.771316
868	obst-E	1	25.1454	0.319086	0.771316
869	Cyp6v1	1	25.1988	0.319086	0.771316
870	CREG	1	25.0854	0.319086	0.771316
871	ND-B8	1	25.1252	0.319086	0.771316
872	Or43b	1	25.0878	0.319086	0.771316
873	Gs2	1	25.6817	0.319086	0.771316
874	osp	1	25.1728	0.319086	0.771316
875	Rbp4	1	25.2307	0.319086	0.771316
876	CG13868	1	25.0182	0.319086	0.771316
877	Efr	1	25.0499	0.319086	0.771316
878	CG31404	1	25.1617	0.319086	0.771316
879	pyd3	1	25.2657	0.319086	0.771316
880	snoRNA:lola-a	1	24.9956	0.319086	0.771316
881	acj6	1	25.1713	0.319086	0.771316
882	vg	1	25.0975	0.319086	0.771316
883	Herp	1	25.0812	0.319086	0.771316
884	FIG4	1	25.1492	0.319086	0.771316
885	ETHR	1	25.1454	0.319086	0.771316
886	CG14445	1	25.1485	0.319086	0.771316
887	CG32085	1	25.2657	0.319086	0.771316
888	mey	1	25.1097	0.319086	0.771316
889	robls54B	1	25.1392	0.319086	0.771316
890	bru2	1	25.073	0.319086	0.771316
891	grass	1	25.074	0.319086	0.771316
892	CG13255	1	25.1073	0.319086	0.771316
893	T3dh	1	24.8816	0.319086	0.771316
894	CG5731	1	25.1392	0.319086	0.771316
895	CG11905	1	25.0854	0.319086	0.771316
896	CG18095	1	25.0737	0.319086	0.771316
897	CG11983	1	25.1613	0.319086	0.771316
898	CG17764	1	25.1613	0.319086	0.771316
899	CG42255	1	25.0916	0.319086	0.771316
900	CG11617	1	25.1191	0.319086	0.771316
901	scaRNA:MeU2-G25	1	25.1073	0.319086	0.771316
902	TpnC41C	1	25.0506	0.319086	0.771316
903	tobi	1	25.0878	0.319086	0.771316
904	CG6959	1	25.0975	0.319086	0.771316
905	Pkcdelta	1	25.182	0.319086	0.771316
906	snoRNA:lola-b	1	25.0193	0.319086	0.771316
907	CG43394	1	24.8816	0.319086	0.771316
908	Tace	1	25.0812	0.319086	0.771316
909	Nek2	1	25.1534	0.319086	0.771316
910	CG31793	1	25.1097	0.319086	0.771316
911	Lsd-1	1	25.1191	0.319086	0.771316
912	CG33235	1	25.1384	0.319086	0.771316
913	sas	1	25.0193	0.319086	0.771316
914	CG4259	1	25.1807	0.319086	0.771316
915	Hexo2	1	24.8816	0.319086	0.771316
916	CG1801	1	25.1314	0.319086	0.771316
917	CG8607	1	25.1191	0.319086	0.771316
918	CG8673	1	25.0764	0.319086	0.771316
919	CG18278	1	25.0708	0.319086	0.771316
920	CG4459	1	24.8816	0.319086	0.771316
921	CG4017	1	25.0708	0.319086	0.771316
922	pug	1	25.0815	0.319086	0.771316
923	CG34263	1	25.0595	0.319086	0.771316
924	egl	1	25.0815	0.319086	0.771316
925	Tsp42Ec	1	25.3006	0.319086	0.771316
926	CG2201	1	25.1492	0.319086	0.771316
927	alpha-Est9	1	25.2657	0.319086	0.771316
928	Acox57D-p	1	25.2307	0.319086	0.771316
929	snoRNA:Psi28S-2648	1	25.1984	0.319086	0.771316
930	beat-IIIc	1	25.0578	0.319086	0.771316
931	CG14860	1	24.8816	0.319086	0.771316
932	CG4592	1	24.9956	0.319086	0.771316
933	CG12991	1	25.184	0.319086	0.771316
934	CG5194	1	25.1811	0.319086	0.771316
935	CG31415	1	25.1492	0.319086	0.771316
936	CG15784	1	25.0975	0.319086	0.771316
937	CG10702	1	24.8816	0.319086	0.771316
938	CG2233	1	25.1412	0.319086	0.771316
939	GstE6	1	25.0778	0.319086	0.771316
940	CG34141	1	25.074	0.319086	0.771316
941	bowl	1	25.2101	0.319086	0.771316
942	Gasp	1	25.0829	0.319086	0.771316
943	CG33552	1	25.1146	0.319086	0.771316
944	DopEcR	1	25.0193	0.319086	0.771316
945	Proc	1	25.16	0.319086	0.771316
946	CG32195	1	25.1811	0.319086	0.771316
947	CG33307	1	25.069	0.319086	0.771316
948	Jon25Bi	1	25.0506	0.319086	0.771316
949	CG13154	1	25.2016	0.319086	0.771316
950	CG3831	1	25.0499	0.319086	0.771316
951	CG31161	1	25.1793	0.319086	0.771316
952	CG1461	1	25.0344	0.319086	0.771316
953	CG11029	1	25.0344	0.319086	0.771316
954	CG45218	1	25.0506	0.319086	0.771316
955	CG31287	1	25.1897	0.319086	0.771316
956	CG32206	1	25.0595	0.319086	0.771316
957	CG44008	1	25.1713	0.319086	0.771316
958	CG14778	1	25.0635	0.319086	0.771316
959	RpS28a	1	25.0193	0.319086	0.771316
960	CG2887	1	25.1296	0.319086	0.771316
961	Picot	1	25.2307	0.319086	0.771316
962	LS2	1	25.0193	0.319086	0.771316
963	CG14285	1	25.1058	0.319086	0.771316
964	TpnC73F	1	25.1172	0.319086	0.771316
965	Acox57D-d	1	25.0815	0.319086	0.771316
966	Lerp	1	25.0958	0.319086	0.771316
967	Fer2	1	25.0344	0.319086	0.771316
968	cbt	1	25.5318	0.319086	0.771316
969	pwn	1	25.182	0.319086	0.771316
970	Gld	1	25.1097	0.319086	0.771316
971	RpS5b	1	25.0854	0.319086	0.771316
972	CG9657	1	25.1592	0.319086	0.771316
973	CG1503	1	25.2757	0.319086	0.771316
974	Nost	1	25.1384	0.319086	0.771316
975	CG31663	1	25.5318	0.319086	0.771316
976	CG11656	1	25.5318	0.319086	0.771316
977	CG4393	1	25.0809	0.319086	0.771316
978	CG34205	1	25.3218	0.319086	0.771316
979	cn	1	25.1863	0.319086	0.771316
980	CG32333	1	25.0975	0.319086	0.771316
981	stumps	1	25.5318	0.319086	0.771316
982	CG12825	1	25.0506	0.319086	0.771316
983	AhcyL2	1	25.3792	0.319086	0.771316
984	CR6434	1	25.0708	0.319086	0.771316
985	CG6398	1	25.1713	0.319086	0.771316
986	CG3955	1	25.1073	0.319086	0.771316
987	CG11658	1	25.1384	0.319086	0.771316
988	Gas8	1	25.5318	0.319086	0.771316
989	CG5895	1	25.1384	0.319086	0.771316
990	CG42240	1	25.2657	0.319086	0.771316
991	Spn28Da	1	25.1988	0.319086	0.771316
992	CG5157	1	25.1097	0.319086	0.771316
993	CG17387	1	25.0878	0.319086	0.771316
994	CG16863	1	25.0975	0.319086	0.771316
995	CR43975	1	25.1314	0.319086	0.771316
996	CG32971	1	25.1058	0.319086	0.771316
997	Tsp5D	1	25.1296	0.319086	0.771316
998	Cyp28d2	1	25.081	0.319086	0.771316
999	snoRNA:Psi28S-1060	1	25.2731	0.319086	0.771316
1000	bbg	1	25.184	0.319086	0.771316
1001	Dysb	1	25.0571	0.319086	0.771316
1002	CG31777	1	25.0499	0.319086	0.771316
1003	Ca-beta	1	25.3279	0.319086	0.771316
1004	CG6569	1	25.0595	0.319086	0.771316
1005	CG13898	1	25.182	0.319086	0.771316
1006	melt	1	25.0764	0.319086	0.771316
1007	CG12071	1	24.8816	0.319086	0.771316
1008	CG12831	1	25.073	0.319086	0.771316
1009	CG15333	1	25.1988	0.319086	0.771316
1010	CG8563	1	25.073	0.319086	0.771316
1011	CG17777	1	25.1807	0.319086	0.771316
1012	Sp7	1	24.9956	0.319086	0.771316
1013	kar	1	25.1296	0.319086	0.771316
1014	CG43845	1	25.0975	0.319086	0.771316
1015	Nmdar1	1	25.1191	0.319086	0.771316
1016	dpr6	1	25.1073	0.319086	0.771316
1017	eIF4E3	1	25.1486	0.319086	0.771316
1018	Cyp4g15	1	25.0854	0.319086	0.771316
1019	JhI-26	1	25.1146	0.319086	0.771316
1020	prage	1	25.1728	0.319086	0.771316
1021	His-Psi:CR33805	1	25.1296	0.319086	0.771316
1022	IFT52	1	25.0595	0.319086	0.771316
1023	CG17801	1	25.3006	0.319086	0.771316
1024	CG10660	1	25.0578	0.319086	0.771316
1025	CG14227	1	25.1097	0.319086	0.771316
1026	CG12910	1	24.9956	0.319086	0.771316
1027	Lapsyn	1	25.0958	0.319086	0.771316
1028	spz5	1	25.0182	0.319086	0.771316
1029	VGlut	1	25.0506	0.319086	0.771316
1030	GstZ1	1	25.1863	0.319086	0.771316
1031	CG15270	1	25.1534	0.319086	0.771316
1032	Cpr49Ac	1	25.1713	0.319086	0.771316
1033	CG6184	1	25.5318	0.319086	0.771316
1034	CG14079	1	25.0809	0.319086	0.771316
1035	CG7737	1	24.9956	0.319086	0.771316
1036	CR45315	1	25.0815	0.319086	0.771316
1037	GluRIIA	1	25.1252	0.319086	0.771316
1038	CG10185	1	25.1314	0.319086	0.771316
1039	snoRNA:Psi18S-525j	1	25.0829	0.319086	0.771316
1040	CG2750	1	25.1191	0.319086	0.771316
1041	CG43078	1	25.0193	0.319086	0.771316
1042	rgn	1	25.4425	0.319086	0.771316
1043	gnu	1	25.0403	0.319086	0.771316
1044	snoRNA:Psi28S-3305c	1	25.0403	0.319086	0.771316
1045	IP3K2	1	25.1289	0.319086	0.771316
1046	form3	1	25.0971	0.319086	0.771316
1047	CG17270	1	25.1262	0.319086	0.771316
1048	CG33054	1	25.0403	0.319086	0.771316
1049	Efhc1.1	1	25.085	0.319086	0.771316
1050	CG13127	1	25.1085	0.319086	0.771316
1051	CG42489	1	25.1085	0.319086	0.771316
1052	CG15484	1	25.0201	0.319086	0.771316
1053	Kr	1	25.0383	0.319086	0.771316
1054	CG34217	1	25.1289	0.319086	0.771316
1055	CG43317	1	25.1289	0.319086	0.771316
1056	AANATL2	1	24.9481	0.319086	0.771316
1057	CG5756	1	25.0201	0.319086	0.771316
1058	Akh	1	25.2211	0.319086	0.771316
1059	Ir47a	1	25.0105	0.319086	0.771316
1060	CG45066	1	25.0705	0.319086	0.771316
1061	CG33090	1	25.0201	0.319086	0.771316
1062	CG5704	1	24.9481	0.319086	0.771316
1063	dpr16	1	25.0105	0.319086	0.771316
1064	ds	1	24.9481	0.319086	0.771316
1065	5-HT1A	1	25.1118	0.319086	0.771316
1066	CG42633	1	25.0399	0.319086	0.771316
1067	CG5565	1	25.0105	0.319086	0.771316
1068	CG11670	1	25.1608	0.319086	0.771316
1069	CG34454	1	25.0463	0.319086	0.771316
1070	Cyp6g1	1	24.9481	0.319086	0.771316
1071	CG1971	1	25.2211	0.319086	0.771316
1072	tomboy40	1	24.9481	0.319086	0.771316
1073	CG34283	1	24.9481	0.319086	0.771316
1074	SP1029	1	25.0399	0.319086	0.771316
1075	Pph13	1	25.1289	0.319086	0.771316
1076	CG13970	1	25.0399	0.319086	0.771316
1077	5.8SrRNA-Psi:CR45857	1	25.0105	0.319086	0.771316
1078	Trpgamma	1	25.0399	0.319086	0.771316
1079	Strica	1	25.1608	0.319086	0.771316
1080	CG42749	1	25.0463	0.319086	0.771316
1081	Ptr	1	25.0463	0.319086	0.771316
1082	CG3270	1	25.1726	0.319086	0.771316
1083	CG31697	1	25.1726	0.319086	0.771316
1084	CG42322	1	25.1726	0.319086	0.771316
1085	CG9691	1	25.1726	0.319086	0.771316
1086	smal	0.999914	0.71	0.318266	0.771316
1087	ATPsynO	0.999107	0.261974	0.318632	0.771316
1088	SCAP	0.996723	0.572893	0.319806	0.772686
1089	eIF2Bgamma	0.991244	0.562024	0.322469	0.776583
1090	mt:ND5	0.991188	0.251621	0.322495	0.776583
1091	EcR	0.990148	0.50582	0.322984	0.777022
1092	CG4042	0.989344	0.846809	0.323436	0.777923
1093	Psf2	0.988555	0.616878	0.323787	0.778512
1094	lgs	0.982955	0.492273	0.326507	0.783365
1095	GstD9	0.982806	0.765524	0.326615	0.783365
1096	CG30403	0.980152	0.83441	0.32794	0.785393
1097	Prosap	0.977959	0.879935	0.329034	0.787453
1098	Coq2	0.977459	0.937259	0.3293	0.78753
1099	upSET	0.977284	0.440308	0.329297	0.78753
1100	Pp2C1	0.976372	0.479029	0.329749	0.788419
1101	CG8490	0.975417	0.561174	0.330239	0.789216
1102	Dys	0.973353	0.683687	0.331274	0.791101
1103	CenG1A	0.970998	0.515009	0.332427	0.79224
1104	CG6479	0.970285	0.619888	0.332789	0.792776
1105	dnc	0.970218	0.675756	0.332842	0.792776
1106	Tollo	0.966851	0.501625	0.334488	0.795235
1107	CG8320	0.965518	0.513334	0.335151	0.796438
1108	Cirl	0.964624	0.462526	0.335591	0.797295
1109	mRpL33	0.962626	0.429727	0.336592	0.799131
1110	Rpn2	0.962609	0.470546	0.336601	0.799131
1111	CG12112	0.957776	0.599943	0.339052	0.80344
1112	Tes	0.956376	0.688311	0.339767	0.804757
1113	CG34148	0.955854	0.913398	0.340073	0.805104
1114	tzn	0.955376	0.454141	0.340237	0.805115
1115	CG33108	0.951075	0.809826	0.342461	0.80932
1116	CG8833	0.950991	0.70641	0.342494	0.80932
1117	CG45050	0.945175	0.471385	0.34541	0.814308
1118	Desat2	0.944513	1.93286	0.346107	0.815571
1119	Task6	0.943238	0.518577	0.346406	0.816083
1120	Pym	0.941955	0.509825	0.347065	0.816471
1121	CG32647	0.941125	1.95258	0.347848	0.816471
1122	Raf	0.93508	0.791406	0.350622	0.816471
1123	scu	0.929911	0.447118	0.353244	0.816471
1124	CG11601	0.926192	1.05025	0.355276	0.816471
1125	Fign	0.924953	0.95204	0.355895	0.816471
1126	CG2841	0.923169	1.04663	0.356847	0.816471
1127	blw	0.920648	0.259421	0.358059	0.816471
1128	CG31759	0.914275	0.940573	0.361463	0.816471
1129	CR43281	0.914138	1.85225	0.361768	0.816471
1130	Mlp60A	0.912274	1.84521	0.362743	0.816471
1131	CG14701	0.91093	0.532686	0.363157	0.816471
1132	AlaRS-m	0.909741	0.935891	0.363844	0.816471
1133	CG2812	0.909645	1.02804	0.363917	0.816471
1134	CG6867	0.909192	1.84088	0.36436	0.816471
1135	CG12159	0.908879	0.864467	0.36428	0.816471
1136	Rab10	0.907936	0.469752	0.364719	0.816471
1137	nonA	0.906289	0.43998	0.365586	0.816471
1138	Sec24AB	0.905639	0.614402	0.365955	0.816471
1139	mRpL55	0.904804	0.463942	0.366378	0.816471
1140	Tl	0.904092	1.83196	0.367049	0.816471
1141	Dyb	0.900151	1.36878	0.369023	0.816471
1142	ND-39	0.899554	0.399682	0.369154	0.816471
1143	CG4133	0.898941	1.14779	0.369609	0.816471
1144	CG1943	0.898843	0.349749	0.369532	0.816471
1145	Teh2	0.895087	1.35571	0.371715	0.816471
1146	CG3626	0.894792	1.01209	0.371781	0.816471
1147	sl	0.892435	0.917855	0.37302	0.816471
1148	Hmt4-20	0.892015	0.459939	0.373178	0.816471
1149	Prosbeta7	0.890764	0.426494	0.373844	0.816471
1150	CG4313	0.887543	1.7791	0.375845	0.816471
1151	mamo	0.886613	1.00234	0.376161	0.816471
1152	Rich	0.885191	0.996564	0.376924	0.816471
1153	CG3168	0.881838	1.77482	0.378914	0.816471
1154	htt	0.880128	0.737202	0.379618	0.816471
1155	Mer	0.877515	0.730873	0.381031	0.816471
1156	CG11357	0.873957	0.433075	0.382915	0.816471
1157	Rhp	0.872691	1.10904	0.383715	0.816471
1158	EMC1	0.87213	0.524005	0.383921	0.816471
1159	wnd	0.872052	1.74399	0.384205	0.816471
1160	mesh	0.872013	1.73825	0.384223	0.816471
1161	Npc1a	0.871676	0.589493	0.384176	0.816471
1162	CRAT	0.871156	1.73799	0.384689	0.816471
1163	Caf1-180	0.870662	0.459466	0.384714	0.816471
1164	CG6788	0.870029	1.73422	0.385302	0.816471
1165	Strip	0.869704	0.547349	0.385252	0.816471
1166	pita	0.868277	0.458153	0.386015	0.816471
1167	snoRNA:Dek-a	0.867637	1.10662	0.386469	0.816471
1168	twe	0.865907	1.72357	0.387549	0.816471
1169	neb	0.865553	0.64206	0.387523	0.816471
1170	Arc2	0.865436	1.30632	0.387719	0.816471
1171	CG13404	0.863958	1.09894	0.38848	0.816471
1172	GstO3	0.863555	1.71797	0.388835	0.816471
1173	CR41597	0.86202	0.718786	0.389483	0.816471
1174	CG33170	0.861912	0.436448	0.389497	0.816471
1175	Vsx2	0.860841	1.71658	0.390325	0.816471
1176	CG4594	0.859873	1.29498	0.390769	0.816471
1177	CG9391	0.859676	1.09386	0.390831	0.816471
1178	mael	0.859062	1.70949	0.3913	0.816471
1179	Leash	0.858953	0.609888	0.391151	0.816471
1180	Hus1-like	0.858792	0.537962	0.391225	0.816471
1181	e(y)2b	0.856813	1.29316	0.392454	0.816471
1182	CG1812	0.855758	0.811328	0.39293	0.816471
1183	CG12948	0.854576	0.524289	0.393549	0.816471
1184	lt	0.854542	0.458828	0.393563	0.816471
1185	CG5191	0.854119	1.69247	0.39402	0.816471
1186	CG34384	0.853636	1.08387	0.394161	0.816471
1187	CG18549	0.852922	0.959713	0.394528	0.816471
1188	CG17029	0.851969	1.68891	0.395207	0.816471
1189	CG14015	0.850584	1.68337	0.395974	0.816471
1190	CG4646	0.850428	0.397962	0.395835	0.816471
1191	Klp64D	0.850128	1.28307	0.396149	0.816471
1192	scaRNA:PsiU1-6	0.850047	1.6845	0.396271	0.816471
1193	CG6282	0.849163	1.68133	0.396761	0.816471
1194	Epg5	0.848971	0.648477	0.396672	0.816471
1195	psq	0.848114	0.41082	0.397123	0.816471
1196	Cdep	0.847945	1.27678	0.397356	0.816471
1197	CG46281	0.847685	1.67813	0.39758	0.816471
1198	CG9123	0.846615	0.740597	0.398006	0.816471
1199	Bub1	0.846422	0.651236	0.398089	0.816471
1200	ytr	0.845517	0.207547	0.3986	0.816471
1201	TMEM216	0.8449	1.67222	0.399127	0.816471
1202	mtd	0.844234	0.513273	0.399295	0.816471
1203	conv	0.843064	0.59735	0.39996	0.816471
1204	GstT3	0.842839	1.26774	0.400198	0.816471
1205	CG7970	0.842744	0.465689	0.40012	0.816471
1206	Mgat2	0.842614	0.736678	0.400237	0.816471
1207	Sap-r	0.841891	0.462093	0.400604	0.816471
1208	CG6928	0.841516	1.66467	0.401014	0.816471
1209	Bsg	0.841236	0.372292	0.400955	0.816471
1210	CG7322	0.840078	1.65941	0.401814	0.816471
1211	Tektin-C	0.839495	0.616194	0.401961	0.816471
1212	CG33521	0.838885	1.26009	0.402406	0.816471
1213	bt	0.838673	1.65558	0.402599	0.816471
1214	CG34417	0.838233	1.26107	0.402772	0.816471
1215	CG14787	0.836731	1.6495	0.403686	0.816471
1216	SCOT	0.836462	1.06	0.403723	0.816471
1217	CG2915	0.836166	0.414981	0.403801	0.816471
1218	PIG-H	0.836026	0.529059	0.403894	0.816471
1219	CG31041	0.835727	1.64824	0.404249	0.816471
1220	CG15765	0.835603	1.64694	0.404318	0.816471
1221	gammaTub37C	0.835571	1.05994	0.404223	0.816471
1222	scpr-C	0.834906	1.25644	0.404638	0.816932
1223	ALiX	0.834151	0.57459	0.404949	0.817254
1224	clt	0.832189	1.63902	0.406235	0.819522
1225	CG6574	0.829533	1.63359	0.40773	0.821719
1226	CG9231	0.829445	0.448967	0.407586	0.821592
1227	pk	0.828067	0.460137	0.408366	0.822639
1228	DNApol-alpha73	0.826989	0.725011	0.409015	0.82316
1229	Gbs-76A	0.826663	0.655207	0.409183	0.82317
1230	angel	0.826546	0.929498	0.409284	0.82321
1231	rasp	0.825784	1.04503	0.409737	0.823793
1232	Rgl	0.82535	1.62058	0.41009	0.82434
1233	Yeti	0.824263	0.167449	0.410519	0.825037
1234	CG18508	0.823949	0.924531	0.410753	0.825344
1235	CG5273	0.823334	1.61746	0.411231	0.825976
1236	CG14664	0.820524	1.6111	0.412825	0.828848
1237	Lamp1	0.819516	0.395023	0.413211	0.829293
1238	maf-S	0.81873	0.400965	0.413659	0.830027
1239	Prx3	0.818552	0.379313	0.413759	0.830063
1240	CG7702	0.817398	1.60517	0.414601	0.831258
1241	ND-75	0.814866	0.432394	0.415866	0.832968
1242	CG31550	0.814577	0.505652	0.416042	0.833127
1243	CG13604	0.81422	1.60043	0.416415	0.833408
1244	ci	0.813081	0.833116	0.416926	0.833694
1245	scat	0.809924	1.20832	0.418806	0.836498
1246	shv	0.808165	0.448008	0.419712	0.837189
1247	fz2	0.807524	0.457087	0.420078	0.837588
1248	CG12316	0.806853	0.608399	0.420488	0.838241
1249	CG6865	0.806365	1.58173	0.420911	0.838566
1250	Arc1	0.805688	0.905354	0.421183	0.838624
1251	vimar	0.805648	0.474179	0.421159	0.838624
1252	Arf102F	0.805456	0.358961	0.421262	0.838624
1253	CG14757	0.804649	1.20212	0.421835	0.839435
1254	chif	0.802123	0.444557	0.423191	0.841636
1255	HIP-R	0.801536	0.385434	0.423525	0.841988
1256	CG31817	0.801194	1.19593	0.423827	0.841988
1257	RhoGAP18B	0.800923	1.01221	0.423951	0.841988
1258	CG15739	0.796941	1.55414	0.426343	0.844845
1259	CG6028	0.796014	0.52418	0.426734	0.845003
1260	Acf	0.796012	0.400243	0.426721	0.845003
1261	snoRNA:Psi28S-1192b	0.79546	1.55206	0.427201	0.845345
1262	Syx13	0.795095	0.547702	0.427268	0.845345
1263	trv	0.795081	1.00595	0.427331	0.845345
1264	mthl14	0.794955	1.55489	0.427496	0.845345
1265	CG9485	0.7945	1.1841	0.427701	0.845449
1266	BoYb	0.79252	1.54565	0.428907	0.84688
1267	MAN1	0.792253	0.57758	0.428927	0.84688
1268	CG10623	0.791973	1.18039	0.429168	0.84719
1269	Atg18b	0.791747	1.18419	0.429301	0.847287
1270	mim	0.790185	0.44486	0.430113	0.848394
1271	Mvb12	0.78947	0.653955	0.430554	0.848755
1272	FASN1	0.789317	0.528389	0.430633	0.848755
1273	hang	0.78791	0.385199	0.431437	0.849857
1274	hfw	0.787171	1.53439	0.43202	0.850586
1275	Chchd2	0.786694	0.390112	0.432151	0.850586
1276	CG3788	0.786236	0.408665	0.432417	0.850783
1277	Ent2	0.78623	0.388193	0.432419	0.850783
1278	CG12708	0.785776	0.426694	0.432687	0.851146
1279	Sema2b	0.7835	0.988362	0.434082	0.853235
1280	Sap130	0.783337	0.47868	0.434125	0.853235
1281	CG32037	0.782931	1.52268	0.434497	0.853709
1282	Rx	0.78211	1.52587	0.434979	0.854157
1283	CG5377	0.781202	0.569361	0.435385	0.854623
1284	ND-B14.5B	0.781013	0.355682	0.435475	0.854633
1285	Ada	0.780497	0.61945	0.4358	0.854836
1286	Ndc1	0.780352	0.42299	0.43587	0.854836
1287	IA-2	0.77931	1.51767	0.43662	0.85605
1288	shrb	0.777646	0.385654	0.437455	0.857187
1289	nvy	0.776279	0.679004	0.438294	0.858361
1290	CG10353	0.776256	0.678769	0.438308	0.858361
1291	Vps16B	0.774342	0.975989	0.439464	0.860061
1292	Pld	0.774106	1.50454	0.439682	0.860218
1293	CG9386	0.772777	1.50014	0.440464	0.861248
1294	CG9117	0.771368	1.49784	0.441296	0.862041
1295	CG5065	0.77092	1.49543	0.44156	0.86239
1296	CG5335	0.76794	1.49347	0.443327	0.863838
1297	Hs3st-A	0.765869	1.49214	0.444554	0.865511
1298	mRpL11	0.76546	0.396657	0.444665	0.865511
1299	CG9643	0.765262	0.395103	0.444785	0.865511
1300	RasGAP1	0.763473	0.393525	0.445847	0.866411
1301	CG11125	0.763149	1.47873	0.446166	0.866566
1302	Usp12-46	0.762973	1.47849	0.44627	0.866566
1303	CG13698	0.761567	1.1307	0.447062	0.86777
1304	CG6310	0.75968	0.850485	0.448145	0.869035
1305	CG4788	0.758699	0.468174	0.4487	0.869642
1306	CG9646	0.758323	0.522159	0.448934	0.869734
1307	qjt	0.757132	1.12318	0.449707	0.870731
1308	Gale	0.756012	0.552329	0.450315	0.871424
1309	CG7420	0.755582	0.951721	0.450609	0.871643
1310	prel	0.754867	0.481176	0.450996	0.872058
1311	CG7367	0.753044	1.45803	0.452195	0.873375
1312	Panx	0.75242	0.465748	0.452459	0.873585
1313	CG31633	0.752319	0.950686	0.452563	0.873585
1314	ATPsynepsilonL	0.749529	0.944955	0.45424	0.874585
1315	jub	0.74932	0.462145	0.45432	0.874585
1316	cid	0.748823	0.545405	0.454629	0.874585
1317	CG30010	0.748615	0.943564	0.45479	0.874585
1318	Mef2	0.747928	0.568875	0.455172	0.874898
1319	CG7461	0.747811	0.498525	0.455234	0.874898
1320	SsRbeta	0.747155	0.355727	0.455617	0.875467
1321	Sap30	0.745424	0.384494	0.456663	0.87681
1322	l(2)gl	0.744312	0.337497	0.457331	0.877593
1323	CG31126	0.743229	0.373208	0.457988	0.878354
1324	crc	0.742714	0.335174	0.458296	0.878536
1325	CG31551	0.7427	1.10216	0.458376	0.878536
1326	CG9686	0.741514	1.09991	0.459093	0.879625
1327	CycH	0.740362	0.514123	0.459729	0.880369
1328	CG8031	0.739005	0.493015	0.460555	0.881534
1329	Vps13	0.738765	0.403413	0.460693	0.881534
1330	Srpk79D	0.738308	1.42296	0.461072	0.881926
1331	mRpS35	0.737226	0.372661	0.461623	0.882479
1332	Scamp	0.736637	0.429538	0.461986	0.882839
1333	olf186-M	0.736211	1.4204	0.462343	0.882934
1334	Rala	0.735882	0.382944	0.46244	0.882934
1335	mRpL16	0.735848	0.353386	0.462459	0.882934
1336	slgA	0.734248	0.372252	0.463431	0.88443
1337	Sec61alpha	0.732213	0.345211	0.46467	0.886419
1338	slmb	0.731818	0.362226	0.464912	0.886419
1339	Cp1	0.730547	0.323616	0.465687	0.887394
1340	Ilk	0.728356	0.477406	0.467033	0.889289
1341	Sf3b5	0.727919	0.263102	0.467289	0.88961
1342	Nckx30C	0.726791	1.39821	0.468078	0.890944
1343	Hexo1	0.721057	1.06553	0.471556	0.896214
1344	htk	0.715123	0.358172	0.475149	0.901563
1345	Vha13	0.715082	0.36208	0.475174	0.901563
1346	ball	0.711479	0.359069	0.4774	0.903753
1347	mRpS21	0.709319	0.316886	0.478734	0.9056
1348	CG9220	0.706431	0.473189	0.480536	0.908667
1349	z	0.700701	0.389802	0.484094	0.913857
1350	CG6179	0.699706	0.39682	0.484717	0.914863
1351	CG17593	0.698793	0.477882	0.485291	0.915604
1352	CG43340	0.698473	0.385498	0.485483	0.915795
1353	Ubi-p63E	0.695445	0.335998	0.487375	0.919021
1354	CG3632	0.694994	0.465441	0.487663	0.919393
1355	beg	0.694614	0.403694	0.487897	0.919662
1356	mt:ND2	0.693387	0.350591	0.488661	0.920931
1357	Lon	0.693181	0.41285	0.488797	0.921016
1358	Nup75	0.690445	0.36939	0.490508	0.923551
1359	CG15914	0.68889	0.502173	0.491492	0.924872
1360	CG30467	0.681292	0.421007	0.496275	0.930596
1361	CG32212	0.678801	0.669018	0.497874	0.932557
1362	CG17754	0.677648	0.666437	0.498603	0.933155
1363	CG10631	0.677188	0.998658	0.498905	0.93345
1364	CG12267	0.676515	0.47455	0.499302	0.934021
1365	CG32576	0.675819	0.355817	0.499734	0.934437
1366	SLIRP2	0.675068	0.460016	0.500217	0.93472
1367	CG4751	0.675045	0.424086	0.500231	0.93472
1368	CG9272	0.674258	0.58483	0.500737	0.935147
1369	CG8060	0.672063	0.524501	0.502132	0.937227
1370	sud1	0.671972	0.504381	0.502186	0.937227
1371	CG15098	0.670407	0.326808	0.503168	0.9383
1372	Vha44	0.666575	0.385891	0.505613	0.941376
1373	Prp3	0.666214	0.338573	0.505842	0.941376
1374	CG8475	0.665456	0.518428	0.50634	0.941956
1375	CG11367	0.665111	0.477699	0.506558	0.942189
1376	kuk	0.664587	0.237321	0.506878	0.94261
1377	mIF3	0.662681	0.514851	0.508112	0.944732
1378	Vps37B	0.662158	0.368038	0.508435	0.944811
1379	CG6654	0.66126	0.650368	0.509034	0.945229
1380	Edem1	0.659739	0.452087	0.509989	0.946745
1381	CR44003	0.659681	0.605878	0.510038	0.946745
1382	RhoGAP15B	0.658148	0.513197	0.511015	0.948346
1383	Spase22-23	0.657937	0.273899	0.511136	0.948346
1384	CG12773	0.657737	0.495565	0.511276	0.948346
1385	w	0.655794	0.645829	0.512539	0.949818
1386	CG1737	0.653217	0.275111	0.514169	0.951966
1387	xit	0.652273	0.486	0.514795	0.952601
1388	TSG101	0.65073	0.406214	0.51578	0.954249
1389	Ipk2	0.6501	0.362947	0.516181	0.95442
1390	CG4951	0.649551	0.374531	0.516536	0.954558
1391	mthl5	0.64929	0.597959	0.516718	0.954588
1392	Gbs-70E	0.649084	0.405506	0.516841	0.954613
1393	Tnpo	0.648042	0.325526	0.517506	0.955519
1394	Mst85C	0.647483	0.394167	0.517875	0.955904
1395	TBCD	0.647046	0.430338	0.51816	0.956202
1396	msl-1	0.644565	0.346729	0.519756	0.958623
1397	CG8207	0.643581	0.4181	0.520398	0.959282
1398	CG11961	0.642725	0.547106	0.520968	0.959632
1399	CG3511	0.642417	0.49903	0.521158	0.959807
1400	CG11722	0.640076	0.406188	0.522672	0.962071
1401	hop	0.636581	0.436856	0.524941	0.964841
1402	Egfr	0.636424	0.357715	0.525041	0.96485
1403	pygo	0.635978	0.343034	0.525329	0.965204
1404	CG18262	0.63449	0.348828	0.526299	0.965933
1405	bon	0.633008	0.317166	0.527261	0.967497
1406	ph-d	0.632886	0.334357	0.527343	0.967497
1407	omd	0.631346	0.422429	0.528355	0.969178
1408	Opa1	0.631118	0.31318	0.528494	0.969257
1409	janA	0.630198	0.199037	0.529109	0.969505
1410	mnb	0.627232	0.287695	0.531034	0.971799
1411	Ranbp21	0.62626	0.452815	0.531681	0.972505
1412	Sdhaf3	0.62592	0.615815	0.531914	0.97267
1413	AMPKalpha	0.625788	0.541492	0.53199	0.97267
1414	CG8839	0.625601	0.666685	0.532132	0.972752
1415	CG11756	0.622889	0.613493	0.533901	0.975153
1416	RpS14b	0.622345	0.286965	0.534237	0.975247
1417	E2f1	0.621328	0.303842	0.534905	0.975528
1418	dati	0.620491	0.503783	0.53547	0.97603
1419	Tango2	0.618662	0.481684	0.536668	0.977509
1420	CG7133	0.616128	0.331423	0.53833	0.978949
1421	HDAC6	0.615661	0.431909	0.538642	0.979165
1422	CG3702	0.614303	0.352187	0.53953	0.980427
1423	sktl	0.613411	0.49864	0.540132	0.981135
1424	CG13365	0.610495	0.327821	0.542047	0.983023
1425	snRNA:U4atac	0.607784	0.427563	0.543846	0.985177
1426	ctrip	0.605963	0.287042	0.545045	0.986369
1427	Got1	0.604552	0.301251	0.545982	0.987629
1428	CG16985	0.604182	0.33537	0.546229	0.987629
1429	nerfin-1	0.595152	0.636727	0.552261	0.996397
1430	san	0.594749	0.273604	0.552507	0.996484
1431	Orc6	0.593173	0.402781	0.553567	0.997565
1432	CG8079	0.593107	0.343901	0.553607	0.997565
1433	Jwa	0.591193	0.304939	0.554885	0.998457
1434	Hers	0.589235	0.30359	0.556195	1
1435	CG13339	0.588117	0.451483	0.556957	1
1436	CG3792	0.586919	0.320467	0.557748	1
1437	CG14621	0.585628	0.44977	0.558626	1
1438	wcy	0.585081	0.294645	0.558981	1
1439	atl	0.582321	0.350903	0.560841	1
1440	ND-B16.6	0.576156	0.230711	0.564988	1
1441	rump	0.575709	0.276112	0.565289	1
1442	CG42673	0.575367	0.41201	0.565532	1
1443	CG8841	0.573455	0.67605	0.566842	1
1444	CG10795	0.571994	0.674848	0.567829	1
1445	CG30015	0.57177	0.412035	0.567957	1
1446	CG31140	0.571284	0.488428	0.568293	1
1447	Atg17	0.566471	0.303798	0.571544	1
1448	wun	0.566337	0.480796	0.571645	1
1449	E(spl)malpha-BFM	0.564813	0.604343	0.572686	1
1450	JTBR	0.560822	0.29387	0.575384	1
1451	CG18011	0.560654	0.663784	0.575524	1
1452	CG9410	0.560207	0.380402	0.575807	1
1453	Gfat2	0.559888	0.477659	0.576029	1
1454	Atg9	0.558284	0.595396	0.577129	1
1455	Sema1b	0.557919	0.307719	0.577362	1
1456	Phf5a	0.557089	0.260604	0.577925	1
1457	Bet5	0.555593	0.356935	0.578953	1
1458	CG12883	0.555204	0.656824	0.579238	1
1459	Start1	0.551284	0.4681	0.581904	1
1460	Tango1	0.551202	0.287517	0.581949	1
1461	CG11858	0.547087	0.267846	0.584769	1
1462	Alg-2	0.546921	0.25839	0.584886	1
1463	l(2)37Bb	0.545152	0.579098	0.586112	1
1464	CG8485	0.540065	0.290007	0.589597	1
1465	ATPsynCF6	0.536321	0.0882857	0.592201	1
1466	Vps45	0.536213	0.631484	0.592273	1
1467	Pten	0.534801	0.276506	0.593225	1
1468	sei	0.532221	0.725317	0.595046	1
1469	Mon1	0.531432	0.361469	0.595558	1
1470	Ptp4E	0.531367	0.519879	0.595608	1
1471	wal	0.52993	0.265992	0.596593	1
1472	Nuf2	0.528766	0.266832	0.5974	1
1473	CG6230	0.525494	0.290362	0.599671	1
1474	Tlk	0.525216	0.214833	0.599863	1
1475	Bmcp	0.524935	0.389771	0.600063	1
1476	Nse1	0.524665	0.281609	0.600245	1
1477	wts	0.52393	0.281764	0.600755	1
1478	Gld2	0.523595	0.710494	0.601022	1
1479	CG2211	0.523492	0.538798	0.601084	1
1480	CG11970	0.522601	0.318959	0.601682	1
1481	snoRNA:Psi28S-3342	0.519329	0.385184	0.60396	1
1482	Orc5	0.518145	0.37235	0.604783	1
1483	snoRNA:Psi28S-2622	0.518092	0.328128	0.604819	1
1484	BHD	0.516131	0.606763	0.606201	1
1485	eco	0.515271	0.312927	0.606788	1
1486	rl	0.512718	0.23638	0.608565	1
1487	ETH	0.511761	0.850789	0.60929	1
1488	Pcd	0.511276	0.299763	0.609577	1
1489	CG9062	0.508869	0.454322	0.611268	1
1490	Rpn8	0.50869	0.230141	0.611382	1
1491	ens	0.508436	0.257777	0.61156	1
1492	arr	0.504875	0.38694	0.614063	1
1493	CG9132	0.504824	0.289093	0.614094	1
1494	S	0.503356	0.249215	0.615123	1
1495	CG17896	0.502725	0.680316	0.615593	1
1496	CG5026	0.500118	0.424649	0.617404	1
1497	Ccs	0.49905	0.396832	0.618157	1
1498	nAChRalpha6	0.498376	0.672037	0.618649	1
1499	TBC1D5	0.498367	0.295749	0.618631	1
1500	Zw	0.497958	0.673083	0.618944	1
1501	mRpS25	0.496902	0.241014	0.619661	1
1502	CG10435	0.496901	0.395582	0.61967	1
1503	Urm1	0.495532	0.442133	0.620635	1
1504	Sec61gamma	0.492949	0.185458	0.622453	1
1505	IP3K1	0.49229	0.578364	0.622927	1
1506	Rox8	0.489985	0.198752	0.62454	1
1507	ppk28	0.486829	0.658972	0.626797	1
1508	CG13392	0.481314	0.407003	0.630686	1
1509	klar	0.481302	0.169242	0.630693	1
1510	Mvl	0.481186	0.430698	0.63078	1
1511	CG5532	0.480484	0.237711	0.63127	1
1512	wac	0.479154	0.190602	0.632216	1
1513	Rrp1	0.475968	0.230361	0.63448	1
1514	CG11456	0.474248	0.638949	0.635725	1
1515	lute	0.473963	0.451289	0.635919	1
1516	Smn	0.473868	0.221119	0.635975	1
1517	DNApol-iota	0.473156	0.423615	0.636489	1
1518	CG6115	0.471818	0.135069	0.637435	1
1519	ND-PDSW	0.468973	0.190586	0.639466	1
1520	CG32808	0.46577	0.626537	0.641773	1
1521	CG1983	0.464017	0.355801	0.643012	1
1522	Aps	0.462147	0.145039	0.64436	1
1523	rad	0.461373	0.760598	0.644939	1
1524	snoRNA:Psi28S-2566	0.46095	0.541773	0.645214	1
1525	GILT3	0.460538	1.1026	0.645597	1
1526	Hmgcr	0.459195	0.538838	0.646472	1
1527	Rpb4	0.457468	0.615691	0.647719	1
1528	mus304	0.456805	0.61503	0.648195	1
1529	CG4645	0.455469	0.254907	0.649137	1
1530	CG43295	0.455236	0.533426	0.649313	1
1531	Plc21C	0.45475	0.311632	0.649658	1
1532	UbcE2H	0.454598	0.61106	0.649779	1
1533	alpha-Man-IIb	0.454283	0.314397	0.649991	1
1534	Traf6	0.453778	0.404551	0.650357	1
1535	Fak	0.452267	0.250925	0.651439	1
1536	Rcd4	0.451338	0.247497	0.652108	1
1537	snoRNA:lola-c	0.450242	0.608911	0.652911	1
1538	CG42450	0.450085	0.739026	0.653042	1
1539	Vha100-2	0.449602	0.604883	0.653372	1
1540	Ctl2	0.449483	0.604461	0.653458	1
1541	ari-1	0.447737	0.249579	0.654702	1
1542	Rbp6	0.447316	0.603095	0.655019	1
1543	not	0.447184	0.239351	0.6551	1
1544	Acer	0.445558	0.73655	0.656302	1
1545	Usp30	0.44528	0.27572	0.656474	1
1546	Cchl	0.444097	0.205283	0.657327	1
1547	Nnf1b	0.442312	0.267405	0.658618	1
1548	wech	0.441001	0.195038	0.659563	1
1549	ND-24	0.440765	0.201702	0.659734	1
1550	CG11999	0.440563	0.204977	0.65988	1
1551	Ns4	0.440377	0.418916	0.660023	1
1552	GATAd	0.439495	0.262589	0.660656	1
1553	CG10948	0.435657	0.492333	0.663453	1
1554	KrT95D	0.435119	0.22785	0.663822	1
1555	mtSSB	0.434713	0.210886	0.664116	1
1556	CG8360	0.433569	0.710548	0.664974	1
1557	CG30069	0.432461	1.02544	0.665827	1
1558	Dhap-at	0.431709	0.70987	0.666324	1
1559	COX6B	0.431672	0.086929	0.666363	1
1560	Fbxl4	0.429418	0.439871	0.667971	1
1561	Rcd1	0.429247	0.227278	0.668085	1
1562	CG1840	0.429023	0.328522	0.66825	1
1563	bou	0.429003	0.210819	0.668262	1
1564	Spt3	0.428779	0.25379	0.668425	1
1565	CG5174	0.428373	0.207494	0.66872	1
1566	Gen	0.427432	0.286167	0.669407	1
1567	dpr18	0.42719	1.00739	0.669654	1
1568	Acyp2	0.424905	0.214042	0.671242	1
1569	CG33331	0.423054	0.434597	0.672602	1
1570	ND-B14.5A	0.422939	0.204085	0.672675	1
1571	nod	0.42182	0.377093	0.673494	1
1572	Ssb-c31a	0.421637	0.126193	0.673633	1
1573	CG17999	0.420962	0.44717	0.674118	1
1574	CG9934	0.420916	0.232442	0.674151	1
1575	CG18324	0.419835	0.564053	0.674949	1
1576	CG5787	0.41776	0.214391	0.676453	1
1577	ssp2	0.415448	0.557368	0.678153	1
1578	Unc-115b	0.415404	0.679247	0.678199	1
1579	CG43085	0.413153	0.675304	0.679844	1
1580	eIF2D	0.41139	0.390203	0.681117	1
1581	CG32066	0.410938	0.200605	0.681443	1
1582	CG11539	0.40883	0.668098	0.683009	1
1583	CG11885	0.407598	0.209297	0.683891	1
1584	snRNA:U5:34A	0.406792	0.665317	0.684503	1
1585	futsch	0.406484	0.364088	0.684711	1
1586	CG6000	0.406146	0.663469	0.684976	1
1587	pdm3	0.405921	0.663555	0.685142	1
1588	Parp	0.405605	0.175451	0.685352	1
1589	CG9919	0.405339	0.543409	0.685557	1
1590	CG6333	0.4043	0.543126	0.68632	1
1591	Stam	0.40398	0.238721	0.686547	1
1592	CG13907	0.400079	0.284111	0.689415	1
1593	CG6013	0.400056	0.277127	0.689431	1
1594	mRpS34	0.399593	0.202833	0.689771	1
1595	Fitm	0.399435	0.379228	0.689892	1
1596	Tango10	0.397711	0.378326	0.69116	1
1597	fz3	0.397225	0.648781	0.691533	1
1598	CG42748	0.396188	0.346201	0.692285	1
1599	Aef1	0.395639	0.289541	0.692685	1
1600	CG15653	0.395268	0.644916	0.692974	1
1601	mRpL14	0.395085	0.189295	0.693091	1
1602	RfC3	0.394906	0.196694	0.693222	1
1603	CG9427	0.393645	0.642208	0.694171	1
1604	Atpalpha	0.393381	0.18509	0.694347	1
1605	CG13775	0.392959	0.526514	0.694666	1
1606	Jra	0.390526	0.399682	0.696462	1
1607	senju	0.390439	0.439047	0.696532	1
1608	cac	0.3895	0.22713	0.697212	1
1609	CG32625	0.389454	0.369764	0.697251	1
1610	dx	0.388823	0.346684	0.697714	1
1611	dgrn	0.388774	0.32251	0.697753	1
1612	ey	0.388063	0.906243	0.698325	1
1613	Golgin104	0.386808	0.397609	0.699209	1
1614	Ack-like	0.386803	0.217178	0.699206	1
1615	roq	0.386167	0.338913	0.699682	1
1616	Trs20	0.385105	0.224906	0.700462	1
1617	CG5823	0.38464	0.199526	0.700806	1
1618	mv	0.384178	0.626832	0.701164	1
1619	CG32533	0.383719	0.392387	0.701495	1
1620	CG9663	0.38368	0.624735	0.701532	1
1621	Dhit	0.383213	0.514042	0.701869	1
1622	alt	0.382425	0.189705	0.702446	1
1623	CG15309	0.382091	0.448689	0.702696	1
1624	dpr14	0.381514	0.44843	0.703123	1
1625	DOR	0.381513	0.264565	0.703122	1
1626	CG30156	0.381052	0.885808	0.703511	1
1627	spn-B	0.380961	0.620937	0.703546	1
1628	CG7668	0.379995	0.212194	0.704247	1
1629	CG42671	0.379513	0.314488	0.704608	1
1630	mus301	0.379298	0.360046	0.704767	1
1631	CG31457	0.378581	0.248194	0.705296	1
1632	ena	0.378409	0.185868	0.705422	1
1633	CG9005	0.378062	0.313974	0.705684	1
1634	spri	0.377488	0.615723	0.706121	1
1635	SmE	0.376171	0.0780545	0.707083	1
1636	Pino	0.376046	0.357577	0.70718	1
1637	CG3847	0.375137	0.199442	0.707851	1
1638	CanA-14F	0.373874	0.8704	0.708835	1
1639	CG34398	0.373501	0.869162	0.709111	1
1640	Efa6	0.372306	0.204074	0.709956	1
1641	Dscam3	0.37105	0.604242	0.710904	1
1642	CG30424	0.369676	0.601252	0.711926	1
1643	PIG-V	0.368982	0.306497	0.712432	1
1644	rnh1	0.367983	0.226508	0.713174	1
1645	mRpL24	0.367512	0.187768	0.713524	1
1646	Drep2	0.366636	0.596948	0.71419	1
1647	ND-B14	0.365044	0.167585	0.715363	1
1648	pix	0.3641	0.179347	0.716066	1
1649	CG16974	0.363342	0.216431	0.716633	1
1650	ncd	0.362643	0.184607	0.717154	1
1651	CG34133	0.36206	0.247273	0.717591	1
1652	ClC-c	0.361899	0.234393	0.717711	1
1653	MFS14	0.360827	0.836459	0.718548	1
1654	nAChRalpha7	0.360827	0.836459	0.718548	1
1655	Dsp1	0.358998	0.047557	0.719961	1
1656	CG11248	0.358383	0.297389	0.720338	1
1657	pre-lola-G	0.357711	0.311625	0.720842	1
1658	CG4565	0.355792	0.824072	0.722309	1
1659	Ekar	0.35459	0.576352	0.723183	1
1660	tow	0.35365	0.179778	0.723876	1
1661	Alk	0.352208	0.572512	0.724966	1
1662	eIF2Bbeta	0.350883	0.192158	0.725949	1
1663	fon	0.350875	0.570765	0.725965	1
1664	bru1	0.350342	0.811878	0.726388	1
1665	RpL7-like	0.35032	0.809298	0.726405	1
1666	ATPsyndelta	0.350123	0.0929148	0.726519	1
1667	mth	0.349755	0.289722	0.726797	1
1668	CG14200	0.349052	0.223511	0.727322	1
1669	mRpS28	0.348464	0.182193	0.727762	1
1670	mRpL40	0.348176	0.175407	0.727978	1
1671	Ppa	0.347525	0.289136	0.728469	1
1672	Chchd3	0.347095	0.180969	0.728789	1
1673	betaCOP	0.346665	0.180582	0.729112	1
1674	CycY	0.345842	0.208194	0.729731	1
1675	CG13124	0.345407	0.795645	0.730088	1
1676	sax	0.345071	0.249179	0.730312	1
1677	CG34213	0.344747	0.560049	0.730561	1
1678	CG32537	0.344618	0.351987	0.730653	1
1679	Usp1	0.344591	0.244606	0.73067	1
1680	Scox	0.344449	0.173113	0.730775	1
1681	CG9915	0.343075	0.169888	0.731808	1
1682	CG8311	0.342398	0.209023	0.732318	1
1683	tRNA:SeC-TCA-1-1	0.341943	0.78891	0.73269	1
1684	CG7744	0.340919	0.256734	0.73343	1
1685	Axn	0.339998	0.1936	0.734122	1
1686	Bili	0.338462	0.781046	0.735307	1
1687	sim	0.33788	0.777867	0.735745	1
1688	brp	0.337117	0.546133	0.736298	1
1689	slx1	0.336733	0.244478	0.736579	1
1690	hbs	0.334637	0.770261	0.738186	1
1691	CG4502	0.333156	0.315611	0.739275	1
1692	nsl1	0.332957	0.163222	0.739423	1
1693	CG8461	0.331895	0.191038	0.740225	1
1694	Cc2d2a	0.331893	0.539318	0.740234	1
1695	CG7536	0.330802	0.249868	0.741051	1
1696	CG4004	0.330503	0.179992	0.741276	1
1697	UQCR-C2	0.330086	0.133448	0.741589	1
1698	Zip99C	0.329268	0.534095	0.742214	1
1699	CG42854	0.328698	0.756092	0.742664	1
1700	CG30491	0.328041	0.310288	0.743135	1
1701	dnr1	0.327526	0.753369	0.743549	1
1702	snoRNA:Psi28S-1135b	0.326561	0.750286	0.744278	1
1703	CG10431	0.326267	0.530626	0.744481	1
1704	7B2	0.325895	0.748716	0.74478	1
1705	Nrx-1	0.325418	0.748185	0.745141	1
1706	mldr	0.324666	0.330867	0.745687	1
1707	Nelf-A	0.323597	0.173174	0.746493	1
1708	nac	0.323483	0.743471	0.746603	1
1709	PPO3	0.323165	0.742623	0.746844	1
1710	CG32017	0.322889	0.741341	0.747053	1
1711	CG7382	0.321689	0.16059	0.747936	1
1712	CG2004	0.320429	0.175072	0.74889	1
1713	CG42827	0.320413	0.519465	0.748908	1
1714	CG2064	0.320172	0.520345	0.749091	1
1715	qkr58E-3	0.318516	0.170332	0.750338	1
1716	CG12065	0.314428	0.297806	0.753438	1
1717	CG11060	0.313927	0.719778	0.75384	1
1718	mura	0.313835	0.208712	0.753889	1
1719	CG43116	0.313291	0.718361	0.754322	1
1720	CG4409	0.312488	0.716952	0.754931	1
1721	mt:ND1	0.311895	0.0943327	0.755368	1
1722	CG14221	0.311581	0.715274	0.755619	1
1723	GstT2	0.311569	0.714475	0.755628	1
1724	CG31548	0.310551	0.17747	0.756382	1
1725	Roc1a	0.31011	0.0580102	0.756731	1
1726	MFS3	0.309976	0.712167	0.756838	1
1727	DCTN3-p24	0.309829	0.157584	0.756929	1
1728	Ama	0.309652	0.710375	0.757084	1
1729	CG7341	0.309132	0.24527	0.757459	1
1730	CG6638	0.309076	0.708888	0.757521	1
1731	snRNA:U5:38ABb	0.308888	0.500514	0.757649	1
1732	Fcp3C	0.307569	0.705019	0.758666	1
1733	Hasp	0.307414	0.704483	0.758784	1
1734	CG8526	0.307165	0.703555	0.758973	1
1735	arm	0.30622	0.153133	0.759672	1
1736	Nup214	0.305755	0.154508	0.760026	1
1737	MME1	0.305623	0.193961	0.760128	1
1738	CG9467	0.304194	0.265535	0.761216	1
1739	mud	0.304027	0.151546	0.761341	1
1740	CG17528	0.303896	0.145492	0.76144	1
1741	cmb	0.303468	0.190177	0.761766	1
1742	teq	0.303458	0.695029	0.761792	1
1743	ple	0.301334	0.689919	0.763409	1
1744	CG10063	0.300923	0.487512	0.763708	1
1745	PDZ-GEF	0.300318	0.151059	0.764164	1
1746	CG4858	0.300164	0.153787	0.764282	1
1747	lwr	0.300012	0.0889414	0.76441	1
1748	Sirt4	0.298928	0.33381	0.765229	1
1749	CG31091	0.298214	0.682384	0.765786	1
1750	Ncoa6	0.29814	0.149788	0.765824	1
1751	CG16779	0.297736	0.681599	0.76615	1
1752	CG30383	0.294887	0.244757	0.768306	1
1753	SdhB	0.294331	0.144142	0.768731	1
1754	wol	0.293768	0.147561	0.76916	1
1755	Myo81F	0.293713	0.671092	0.769218	1
1756	hwt	0.293533	0.670872	0.769356	1
1757	PpV	0.29287	0.167424	0.769846	1
1758	Hydr2	0.292676	0.17824	0.769996	1
1759	Gos28	0.292622	0.171689	0.770035	1
1760	CG2082	0.292003	0.6675	0.770523	1
1761	ry	0.290845	0.664836	0.771408	1
1762	PR-Set7	0.290779	0.128787	0.771442	1
1763	CG8089	0.290617	0.664101	0.771582	1
1764	CR40190	0.289075	0.6604	0.77276	1
1765	alpha-Man-Ic	0.288938	0.660275	0.772864	1
1766	CG14312	0.28735	0.656379	0.774078	1
1767	CG14864	0.287075	0.655973	0.774288	1
1768	S1P	0.286319	0.653575	0.774867	1
1769	CG34353	0.285477	0.65217	0.775511	1
1770	yuri	0.285261	0.651571	0.775676	1
1771	CG14834	0.284983	0.650539	0.775889	1
1772	CG5096	0.284634	0.649563	0.776156	1
1773	CG5262	0.284533	0.649148	0.776233	1
1774	CG18004	0.284356	0.151837	0.776355	1
1775	CG11241	0.283952	0.647761	0.776678	1
1776	CG32712	0.283166	0.646454	0.777279	1
1777	CG17931	0.282	0.14518	0.778158	1
1778	CG13807	0.281887	0.149975	0.778245	1
1779	CG40498	0.28182	0.643157	0.77831	1
1780	dor	0.281551	0.288656	0.778504	1
1781	Ca-alpha1D	0.279865	0.638116	0.779807	1
1782	CG34310	0.278216	0.241341	0.78106	1
1783	CG31638	0.276948	0.161679	0.782032	1
1784	CG2533	0.276449	0.630139	0.782426	1
1785	CG33136	0.276044	0.629486	0.782736	1
1786	Shal	0.275898	0.628821	0.782849	1
1787	IKKbeta	0.275547	0.239667	0.783107	1
1788	CG11786	0.275214	0.627105	0.783374	1
1789	CG10561	0.274181	0.624669	0.784166	1
1790	mRpL17	0.273243	0.132925	0.784874	1
1791	CG12963	0.272911	0.621736	0.785141	1
1792	CG9436	0.27166	0.618911	0.786101	1
1793	tld	0.270343	0.615718	0.787113	1
1794	Ance-5	0.26981	0.614927	0.787523	1
1795	CG7509	0.269674	0.613842	0.787627	1
1796	nrm	0.269504	0.613651	0.787758	1
1797	CG31715	0.268658	0.127542	0.788397	1
1798	NaPi-T	0.268418	0.611314	0.788592	1
1799	hbn	0.268393	0.236068	0.788602	1
1800	Vamp7	0.268041	0.154163	0.788872	1
1801	Rad51D	0.264448	0.601775	0.791645	1
1802	vir-1	0.263883	0.60158	0.79208	1
1803	PIG-Wa	0.263733	0.600194	0.792196	1
1804	CG32638	0.263507	0.600407	0.79237	1
1805	daw	0.263325	0.599166	0.79251	1
1806	140up	0.263038	0.142488	0.792721	1
1807	CG15478	0.263019	0.598562	0.792745	1
1808	snoRNA:Psi28S-3316c	0.262661	0.598351	0.793021	1
1809	CG3358	0.262381	0.170031	0.793228	1
1810	AGO1	0.261772	0.126479	0.793696	1
1811	Atf3	0.261567	0.595188	0.793863	1
1812	cwo	0.261409	0.594743	0.793985	1
1813	wisp	0.261312	0.594055	0.79406	1
1814	nolo	0.260164	0.592183	0.794944	1
1815	bchs	0.259637	0.239157	0.795343	1
1816	CG9121	0.258461	0.588201	0.796256	1
1817	CG3036	0.258127	0.587031	0.796514	1
1818	unc-13-4A	0.25781	0.586599	0.796758	1
1819	GIIIspla2	0.257314	0.166081	0.797132	1
1820	CG7289	0.257306	0.287693	0.79714	1
1821	Takl1	0.257034	0.584388	0.797356	1
1822	Jheh1	0.256742	0.583728	0.797582	1
1823	WASp	0.25653	0.223285	0.797737	1
1824	Plod	0.255077	0.199131	0.798858	1
1825	euc	0.2543	0.578089	0.799465	1
1826	X11Lbeta	0.251875	0.280366	0.801331	1
1827	mRpS29	0.251499	0.157009	0.801619	1
1828	CG2991	0.251256	0.132755	0.801806	1
1829	Bx	0.251006	0.570322	0.802007	1
1830	CG15210	0.249804	0.567533	0.802935	1
1831	CG7872	0.24911	0.127958	0.803464	1
1832	Tdrd3	0.248914	0.14102	0.803616	1
1833	Surf4	0.248862	0.130436	0.803656	1
1834	dop	0.247691	0.193243	0.804561	1
1835	CG42514	0.246896	0.561206	0.805183	1
1836	conu	0.246673	0.151109	0.805348	1
1837	hoe1	0.246323	0.559312	0.805625	1
1838	CG8237	0.245997	0.156397	0.805871	1
1839	Hip14	0.245873	0.192427	0.805968	1
1840	CG9593	0.245761	0.558306	0.80606	1
1841	Stt3B	0.245296	0.123885	0.806413	1
1842	CG11753	0.244782	0.154162	0.806811	1
1843	mtrm	0.244733	0.556107	0.806855	1
1844	APC7	0.244589	0.555727	0.806966	1
1845	CG16989	0.244366	0.158561	0.807133	1
1846	CG4074	0.243354	0.211775	0.807915	1
1847	lace	0.242839	0.170551	0.808313	1
1848	PIP5K59B	0.242351	0.550605	0.808698	1
1849	AnxB9	0.241698	0.269063	0.809198	1
1850	CG42554	0.238974	0.20738	0.811307	1
1851	CG10674	0.238288	0.124126	0.811837	1
1852	clos	0.236588	0.537298	0.813161	1
1853	Yp2	0.235816	0.53469	0.813759	1
1854	Atg14	0.235638	0.139381	0.813892	1
1855	Orc4	0.234561	0.129383	0.814727	1
1856	Eip78C	0.233828	0.530416	0.8153	1
1857	tok	0.233689	0.529844	0.815408	1
1858	loco	0.233382	0.148199	0.815641	1
1859	salm	0.233294	0.52949	0.815715	1
1860	wls	0.23322	0.154763	0.815767	1
1861	CG8369	0.233129	0.528841	0.815843	1
1862	CG8152	0.233016	0.181692	0.815926	1
1863	CG7781	0.232592	0.527567	0.816259	1
1864	gol	0.231849	0.525773	0.816835	1
1865	His-Psi:CR31614	0.231645	0.525358	0.816994	1
1866	CG13369	0.231104	0.166409	0.817409	1
1867	CG18155	0.230618	0.522857	0.81779	1
1868	TM4SF	0.230037	0.521799	0.818241	1
1869	CG31278	0.229493	0.145194	0.818659	1
1870	Try29F	0.229088	0.519211	0.818978	1
1871	veli	0.22801	0.119298	0.819811	1
1872	CG15435	0.226701	0.514069	0.820831	1
1873	P5cr	0.226368	0.128146	0.821086	1
1874	CG18628	0.226327	0.513423	0.821122	1
1875	CG6287	0.225897	0.511762	0.821456	1
1876	Hnf4	0.225718	0.511822	0.821595	1
1877	Mps1	0.22483	0.186361	0.822281	1
1878	mav	0.224554	0.508928	0.8225	1
1879	CG9147	0.224131	0.134729	0.822825	1
1880	lva	0.223234	0.12909	0.823522	1
1881	CG33111	0.223087	0.248833	0.823637	1
1882	nahoda	0.222911	0.505274	0.823777	1
1883	CG32091	0.222568	0.504379	0.824043	1
1884	dnd	0.221449	0.358069	0.824909	1
1885	TMS1	0.221127	0.116853	0.82516	1
1886	CG5080	0.218205	0.493726	0.827437	1
1887	CG3407	0.217852	0.273146	0.827711	1
1888	CG8272	0.217044	0.492199	0.82834	1
1889	sls	0.215798	0.488964	0.829311	1
1890	Prosalpha5	0.215162	0.0531698	0.829805	1
1891	dome	0.214897	0.142966	0.830009	1
1892	CG1640	0.214575	0.167901	0.83026	1
1893	ATPsynG	0.212659	0.0351113	0.831765	1
1894	Topors	0.212309	0.266929	0.832028	1
1895	KLHL18	0.21164	0.128723	0.832546	1
1896	rho-7	0.211313	0.148099	0.832802	1
1897	dos	0.210955	0.171739	0.833082	1
1898	CG7650	0.210759	0.171783	0.833234	1
1899	CG17129	0.210729	0.477685	0.83326	1
1900	CG8963	0.210543	0.102342	0.833401	1
1901	CG10731	0.209085	0.147272	0.834539	1
1902	Ubc4	0.208866	0.104725	0.834711	1
1903	robo1	0.207878	0.261108	0.835483	1
1904	MED19	0.207343	0.101342	0.835898	1
1905	vir	0.20686	0.161695	0.836275	1
1906	CG31495	0.206711	0.467642	0.836393	1
1907	Ocrl	0.206193	0.153652	0.836796	1
1908	CG15642	0.206171	0.190139	0.836813	1
1909	Plap	0.20549	0.119708	0.837343	1
1910	Tcs3	0.204617	0.117717	0.838025	1
1911	CG7044	0.2031	0.151285	0.839209	1
1912	CG34031	0.202407	0.225532	0.839751	1
1913	drpr	0.202356	0.12211	0.83979	1
1914	CG11414	0.201584	0.125183	0.840393	1
1915	CG42232	0.200801	0.090572	0.841005	1
1916	Apf	0.200744	0.124354	0.84105	1
1917	Appl	0.200557	0.156898	0.841195	1
1918	rut	0.200475	0.144931	0.84126	1
1919	CG14183	0.200095	0.452684	0.841558	1
1920	CG10082	0.198435	0.127802	0.842853	1
1921	CG43366	0.198409	0.449098	0.842876	1
1922	RhoGAP1A	0.198397	0.104634	0.842883	1
1923	SelR	0.197981	0.122671	0.843208	1
1924	snoRNA:Or-aca5	0.196744	0.15959	0.844175	1
1925	beat-Ia	0.196649	0.444742	0.844251	1
1926	Rcd-1	0.196212	0.098336	0.844591	1
1927	CG2310	0.195709	0.217785	0.844985	1
1928	sstn	0.195157	0.16978	0.845416	1
1929	isopeptidase-T-3	0.195136	0.193377	0.845434	1
1930	Golgin245	0.195064	0.135337	0.845489	1
1931	Neurl4	0.193881	0.165078	0.846415	1
1932	CG17032	0.193407	0.190533	0.846786	1
1933	CG31957	0.192707	0.0968457	0.847332	1
1934	Cap-D2	0.191941	0.105679	0.847932	1
1935	Crk	0.191819	0.0974903	0.848027	1
1936	CG43293	0.191471	0.433521	0.848302	1
1937	CG10492	0.190827	0.126384	0.848804	1
1938	CG8569	0.190116	0.175072	0.849361	1
1939	Trs23	0.189107	0.13615	0.85015	1
1940	CG14442	0.186082	0.0942288	0.852519	1
1941	Ack	0.185603	0.122048	0.852895	1
1942	PHGPx	0.18501	0.0871194	0.85336	1
1943	Pde9	0.183339	0.273177	0.854674	1
1944	CanA1	0.183139	0.413355	0.854827	1
1945	CG2116	0.181784	0.101381	0.855888	1
1946	CG8578	0.180821	0.104529	0.856643	1
1947	Ace	0.180594	0.408379	0.856822	1
1948	l(2)05714	0.179695	0.0898157	0.857526	1
1949	mthl3	0.179308	0.406066	0.857831	1
1950	tup	0.178429	0.223934	0.85852	1
1951	CG8080	0.178257	0.223168	0.858655	1
1952	rn	0.177798	0.402193	0.859015	1
1953	IntS11	0.177637	0.123489	0.859141	1
1954	Vha14-1	0.176535	0.0869637	0.860005	1
1955	CG5815	0.17513	0.118952	0.861108	1
1956	Slip1	0.174941	0.0914344	0.861257	1
1957	mei-9	0.174787	0.172447	0.861379	1
1958	CG12320	0.171131	0.214619	0.864249	1
1959	CG6567	0.17021	0.104043	0.864972	1
1960	CG32069	0.16938	0.0851564	0.865624	1
1961	Pex3	0.168578	0.0929264	0.866254	1
1962	Fur1	0.166516	0.124963	0.867875	1
1963	CG7849	0.164681	0.103397	0.869318	1
1964	mRpS33	0.161878	0.0788377	0.871522	1
1965	hng1	0.161742	0.109362	0.871629	1
1966	CG6495	0.160934	0.363036	0.872266	1
1967	mats	0.159235	0.0907595	0.873602	1
1968	dpr11	0.158542	0.35816	0.874148	1
1969	MtnA	0.157584	0.144234	0.874904	1
1970	kni	0.156482	0.352976	0.87577	1
1971	tna	0.154358	0.069225	0.877442	1
1972	CG30460	0.153735	0.346773	0.877933	1
1973	CG6650	0.153507	0.142113	0.878113	1
1974	mRpL42	0.153205	0.0755679	0.878351	1
1975	ome	0.153073	0.346169	0.878455	1
1976	CG8379	0.152826	0.113095	0.878649	1
1977	CG13742	0.151921	0.189752	0.879363	1
1978	blanks	0.150095	0.33901	0.880801	1
1979	Chrac-16	0.147464	0.0695504	0.882875	1
1980	Vhl	0.141835	0.139711	0.887316	1
1981	sub	0.141138	0.0745903	0.887866	1
1982	Cyp309a2	0.140177	0.316918	0.888624	1
1983	CG6191	0.140137	0.207211	0.888658	1
1984	scf	0.135353	0.115467	0.892433	1
1985	CG5466	0.135114	0.150912	0.892621	1
1986	Map205	0.134663	0.0663721	0.892978	1
1987	fs(2)ltoPP43	0.133426	0.0680036	0.893955	1
1988	MFS15	0.130648	0.163449	0.896151	1
1989	Acsl	0.127972	0.0700241	0.898266	1
1990	CG13887	0.126795	0.0550858	0.899197	1
1991	CG31064	0.126073	0.1405	0.899767	1
1992	CG14440	0.125647	0.0739839	0.900104	1
1993	Pbgs	0.123753	0.154946	0.901603	1
1994	bif	0.122601	0.062117	0.902514	1
1995	klg	0.121014	0.179923	0.903771	1
1996	CG32982	0.120802	0.150942	0.903937	1
1997	CG3176	0.120727	0.0830807	0.903997	1
1998	zip	0.117765	0.0567727	0.906341	1
[truncated: 8,110 more rows]
